## Big trees drive forest structure patterns across a lowland Amazon regrowth gradient

Tassiana Maylla Fontoura Caron<sup>1</sup>, Victor Juan Ulises Rodriguez Chuma<sup>2</sup>, Alexander Arévalo Sandi<sup>3</sup>, Darren Norris<sup>1, 3, 4 \*</sup>

<sup>1</sup> Programa de Pós-Graduação em Biodiversidade Tropical, Universidade Federal do Amapá (UNIFAP), Rod. Juscelino Kubitschek, Km 02, 68902-280, Macapá, AP, Brazil.

<sup>2</sup> Facultad de Ciencias Forestales, Universidad Nacional de la Amazonia Peruana (UNAP), Pevas 5ta cuadra, Iquitos, Perú.

<sup>3</sup> Programa de Pós-graduação em Ecologia, Instituto Nacional de Pesquisas da Amazônia (INPA), Av. André Araújo 2936, Petrópolis 69067-375 Manaus, AM, Brazil.

<sup>4</sup> Coordenação de Ciências Ambientais, Universidade Federal do Amapá (UNIFAP), Rod. Juscelino Kubitschek Km 02, 68902-280 Macapá, AP, Brazil

\*\* Corresponding author at: Coordenação de Ciências Ambientais, Universidade Federal do Amapá (UNIFAP), Rod. Juscelino Kubitschek Km 02, 68902-280 Macapá, AP, Brazil. Email address: [dnorris75@gmail.com](mailto:dnorris75@gmail.com) (D. Norris).

## 1 **Abstract**

2 Degraded Amazonian forests can take decades to recover and the ecological results of natural  
3 regeneration are still uncertain. Here we use field data collected across 15 lowland Amazon  
4 smallholder properties to examine the relationships between forest structure, mammal diversity,  
5 regrowth type, regrowth age, topography and hydrography. Forest structure was quantified together  
6 with mammal diversity in 30 paired regrowth-control plots. Forest regrowth stage was classified into  
7 three groups: late second-regrowth, early second-regrowth and abandoned pasture. Basal area in  
8 regrowth plots remained less than half that recorded in control plots even after 20-25 years. Although  
9 basal area did increase in sequence from pasture, early to late-regrowth plots, there was a significant  
10 decline in basal area of late-regrowth control plots associated with a decline in the proportion of  
11 large trees. There was also contrasting support for different non-mutually exclusive hypotheses, with  
12 proportion of small trees (DBH <20cm) most strongly supported by topography (altitude and slope)  
13 whereas the proportion of large trees (DBH >60cm) supported by plot type and regrowth class. These  
14 findings support calls for increased efforts to actively conserve large trees to avoid retrogressive  
15 succession around edges of degraded Amazon forests.

16

## 17 **Introduction**

18 Healthy tropical forests provide goods and services to human populations. Yet tropical forests show  
19 worrying rates of forest loss with an elevated loss / gain ratio and a statistically significant trend in  
20 annual forest loss of 2101 km<sup>2</sup>/year<sup>1</sup>. One option to revert tropical forest loss is the restoration of  
21 degraded forests and deforested landscapes<sup>2,3</sup>. Although the post-disturbance restoration of forest  
22 ecosystems often involves passive restoration strategies (i.e. natural regeneration), the ecological  
23 results of this type of restoration are still uncertain<sup>2-4</sup>.

24 Continuing widespread forest losses across Amazonia compromises vital ecosystem services  
25 such as carbon storage, regulation of hydrological cycles and climate patterns<sup>5-7</sup>. Riverside forests  
26 are particularly threatened and suffer losses due to the conversion of forest cover to pastures,  
27 compromising the maintenance of water flows<sup>8</sup>. The recovery of degraded areas is necessary to  
28 recuperate the standing forest value and the Amazon offers an excellent recovery opportunity due to  
29 its natural potential for regeneration<sup>9,10</sup>. Yet, the regrowth rate of degraded Amazon forests can be  
30 slow, as abandoned areas are typically on compacted poor quality soils<sup>11,12</sup> and due to the high  
31 structural and biological diversity of the original forests<sup>13</sup>.

32 Separating the complex interactions driving recruitment and recovery patterns of highly diverse  
33 Amazon forests is challenging<sup>2,3,14,15</sup>, yet we know that different faunal groups can modulate and  
34 generate key impacts<sup>16-19</sup>. Indeed, the successional trajectory of natural regeneration in degraded  
35 forests can depend strongly on the concomitant recovery of faunal diversity and associated  
36 ecosystem services (e.g. seed dispersal)<sup>20-22</sup>. For example, seed predation by both vertebrates and  
37 invertebrates<sup>23,24</sup> can limit germination and subsequent recruitment<sup>22</sup>. Long-term experiments have  
38 demonstrated the impact of vertebrates on recruitment, showing how this group contributes to the  
39 maintenance of tropical forest species and structural diversity<sup>25-28</sup>.

40 Amazon mammals are important component of forest diversity<sup>25,29</sup> including carbon<sup>28</sup> and  
41 biomass cycles<sup>18</sup>. Mammals can also play an important role in the successional trajectory and  
42 recovery of degraded areas as dispersers and predators of both seeds and seedlings<sup>23</sup>. Mid- and  
43 large-bodied mammals (weight > 1 kg) can disperse a large numbers of seeds over long distances  
44<sup>23,30</sup>. For example, lowland tapirs can travel over 4 kilometers in a day<sup>31</sup> and disperse seeds of more  
45 than 70 tree species<sup>32</sup>. The loss of mid- to large-bodied mammals may release some plant species  
46 from herbivory and increase their dominance, which subsequently decreases tropical forest  
47 biodiversity<sup>33,34</sup>.

48 Given the need to understand the patterns of forest structure in Amazonian forests, here we aim  
49 to identify how biotic and abiotic factors (Table 1) can explain patterns in forest structure across a  
50 successional gradient.

51

52 Table 1. Explanatory variables.

| Working Hypothesis/Model | Variables                    | Source                      | Description/Ecological relevance                                                                                                                                                                                               | Supporting references |
|--------------------------|------------------------------|-----------------------------|--------------------------------------------------------------------------------------------------------------------------------------------------------------------------------------------------------------------------------|-----------------------|
|                          | Plot type                    | In situ.                    | Categorical factor with two levels: control and regrowth. Included in all models.                                                                                                                                              |                       |
| Topography               | Altitude                     | SRTM-DEM                    | Altitude is a driver and modulator of species distribution patterns from microhabitat to biogeographic scales. Altitude not only affects soil, water availability, climate and a myriad of other abiotic and biotic variables  | 10,13,35,36           |
|                          | Slope                        | SRTM-DEM                    | Slope affects soil, water availability and tree mortality rates.                                                                                                                                                               |                       |
| Hydrography              | TWI                          | SRTM-DEM                    | Topographic wetness index accounts for the topographic control of water movement in sloped landscapes and the associated control on soil moisture.                                                                             | 37                    |
|                          | Drainage proximity           | SRTM-DEM                    | Combination of water gravitational potential (Height above the nearest drainage (HAND)) and soil drainage (Horizontal distance from nearest drainage (HDND)).                                                                  | 38-40                 |
| Regrowth class           | Regrowth class               | In situ: interview          | Land-use history has a strong influence on rates of forest recovery. Categorical factor with three levels of regrowth class derived from the land-use history: late second-regrowth forest, early second-regrowth and pasture. | 10,16,41,42           |
| Time                     | Years since last use         | In situ: interview          |                                                                                                                                                                                                                                |                       |
|                          | Years since initial clearing | In situ: interview          | Time is a major determinant of forest succession.                                                                                                                                                                              |                       |
| Mammals                  | Species richness             | In situ: camera-trap images |                                                                                                                                                                                                                                |                       |
|                          | Functional diversity         | In situ: camera-trap images | Mammal diversity is positively related to tree biomass.                                                                                                                                                                        | 17,18,28,43           |

53

54

55 Table 2. Summary of survey locations. Characteristics of 15 sites used to study forest structure.  
 56 Values are means with ranges in parentheses.

| Regrowth class | Sites/ Plots | Size (ha)  | Distance  |             | Forest cover (%) |             | Tree BA (m <sup>2</sup> /ha) |             | Large tree BA (m <sup>2</sup> /ha) |             |
|----------------|--------------|------------|-----------|-------------|------------------|-------------|------------------------------|-------------|------------------------------------|-------------|
|                |              |            | River (m) | Town (km)   | 1 km             | 5 km        | Reg.                         | Cont.       | Reg.                               | Cont.       |
| Late           | 5/10         | 5.8        | 288.15    | 40.4        | 91.5             | 97.4        | 17.6                         | 35.8        | 1.5                                | 11.4        |
|                |              | (2.0–12.0) | (110–554) | (35.0–45.0) | (87.4–95.4)      | (96.4–98.5) | (11.5–25.3)                  | (21.7–47.4) | (0.0–7.7)                          | (0.0–22.3)  |
| Early          | 5/10         | 2.4        | 348.5     | 38.2        | 90.7             | 97.2        | 11.1                         | 49.3        | 0.0                                | 20.8        |
|                |              | (1.0–4.5)  | (150–554) | (30.0–43.7) | (87.1–96.0)      | (96.4–98.4) | (4.7–19.2)                   | (34.6–76.5) | (0.0–0.0)                          | (0.0–44.2)  |
| Pasture        | 5/10         | 8.7        | 266.8     | 32.8        | 88.8             | 96.9        | 5.8                          | 47.1        | 0.0                                | 24.0        |
|                |              | (6.8–9.9)  | (170–461) | (26.8–40.8) | (85.7–91.1)      | (95.5–98.5) | (0.0–15.9)                   | (32.6–64.8) | (0.0–0.0)                          | (12.0–41.2) |
| Totals         | 15/30        | 5.6        | 301.1     | 37.1        | 90.4             | 97.2        | 11.5                         | 44.1        | 0.5                                | 18.8        |
|                |              | (1.0–12.0) | (110–554) | (26.8–45.0) | (85.7–96.0)      | (95.5–98.5) | (0.0–25.3)                   | (21.7–76.4) | (0.0–7.7)                          | (0.0–44.2)  |

57

## 58 Results

### 59 Variation in stand structure variables

60 There were clear differences in forest structure between control and regrowth plots (Figure 1). On  
 61 average control plots had increased basal area and increased proportion of large trees (Figure 1). In  
 62 contrast regrowth plots tended to have increased proportion of small trees (<20 cm DBH).

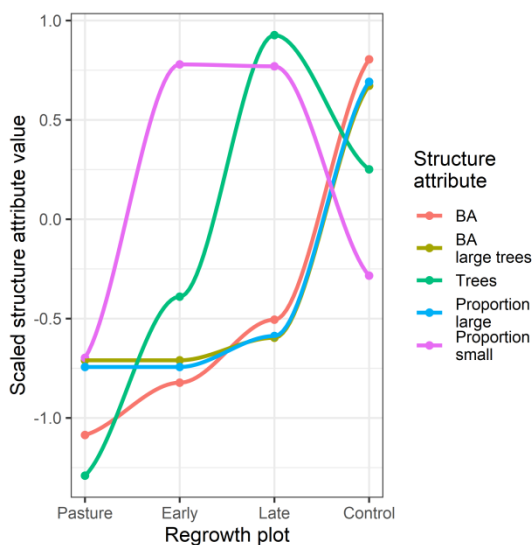

63

64 Figure 1: Forest structure changes across a lowland forest regrowth gradient. Showing mean values of five  
 65 forest structure attributes recorded in 30 plots (15 control and 15 regrowth). Regrowth plot shows differences  
 66 between control, late second-regrowth, early second-regrowth and pasture plots. Values are scaled (centered

67 and scaled by the standard deviation) to enable simultaneous visual comparison of the different attributes. The  
68 lines are from LOESS smoothing as guides to aid visual interpretation.  
69  
70  
71 The number and basal area of living trees tended to increase with altitude and this relationship was  
72 stronger in regrowth areas (Figure 2). The relationship with altitude was strongly affected by low  
73 lying (90 masl) pasture plots with no trees that generated significant leverage on the linear  
74 relationship (Figure 2).

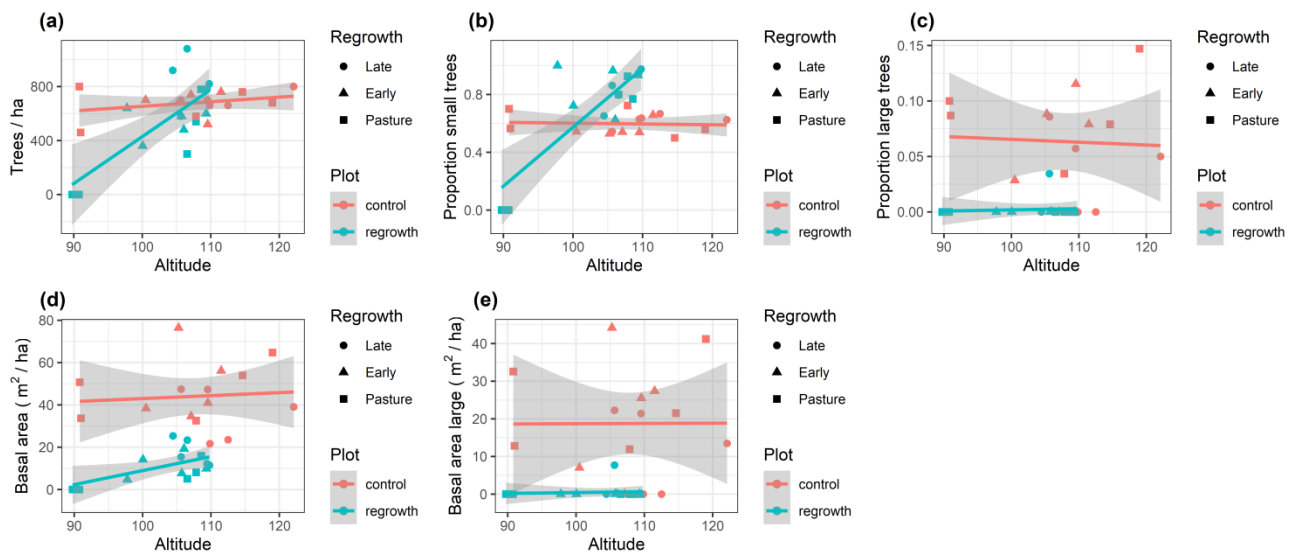

75

76 Figure 2: Forest structure along a lowland Amazon regrowth gradient. Showing trends in (a) number of trees  
77 (> 10 cm DBH) per ha, (b) proportion of small trees (10 – 20 cm DBH), (c) proportion of large (> 60 cm  
78 DBH) trees, (d) basal area and (e) basal area of large (>60 cm DBH) tree in 30 plots (15 control and 15  
79 regrowth). Lines and shaded areas are mean values and 95% confidence intervals from linear models  
80 illustrating trends in basal area with increasing altitude (masl). Points with different shapes represent different  
81 regrowth classes.

82

83 Basal area ranged from 0 to 76.4 m<sup>2</sup>/ha across the 30 survey plots (Table 2), with control plots  
84 showing an average fourfold increase in basal area compared with regrowth plots (mean basal area  
85 44.1 and 11.5 m<sup>2</sup>/ha, control and regrowth respectively, Figure 2). The patterns in plot basal area also  
86 differed between regrowth classes (Figure 3, Supplementary Table S1). There was a significant  
87 interaction between plot type (control/regrowth) and regrowth stage, with basal area increasing  
88 across pasture, early and late regrowth plots but control plots showing the opposite trend, with basal  
89 area decreasing significantly in late-regrowth control plots (Figure 3).

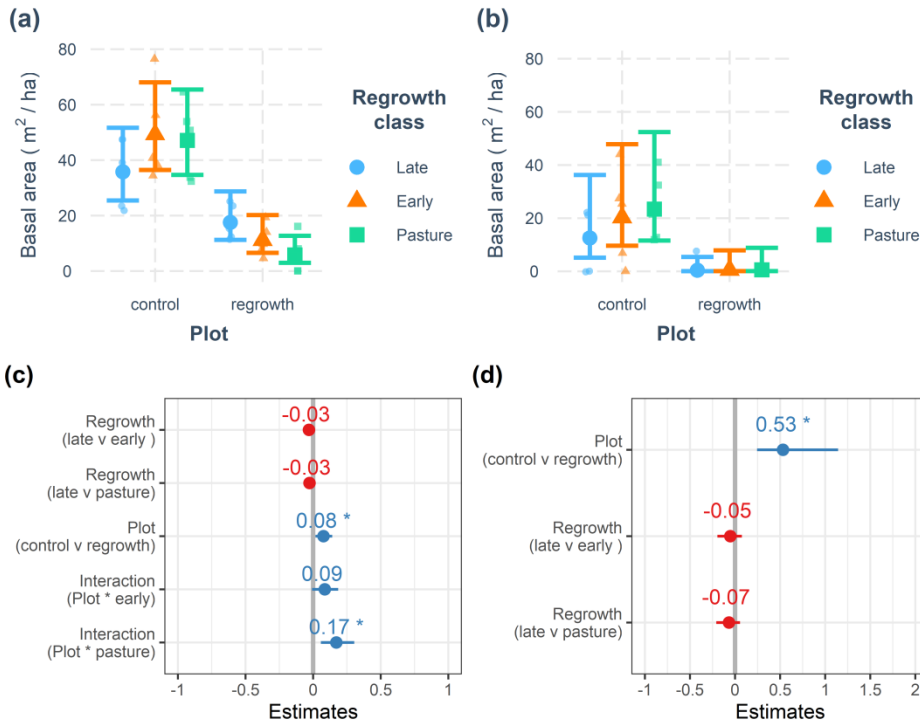

90

91 Figure 3: Basal area changes across a lowland forest regrowth gradient. The basal area of all (a and c) and  
 92 large (b and d) living trees were recorded in 30 plots (15 control and 15 regrowth). Regrowth class shows  
 93 differences between late second-regrowth, early second-regrowth and pasture plots contrasted with control  
 94 forest plots. Top row shows Generalized Linear Model (GLM) predictions (mean and 95% confidence  
 95 intervals) for basal area of (a) all and (b) large trees. Bottom row is the associated Forest-plot of the most  
 96 parsimonious GLMs testing for interactions between regrowth class, plot type and years since last use in the  
 97 basal area of (c) all and (d) large trees. Forest-plots show coefficient estimates and standard errors.

98

99 There was a highly significant positive linear relationship between overall basal area and large  
 100 tree basal area ( $F_{1,28} = 127.5$ ,  $R^2 = 0.82$ ,  $P < 0.0001$ ). The basal area of large trees decreased  
 101 significantly in regrowth compared with control plots (Figure 3). On average large trees accounted  
 102 for 42% of the basal area in control plots compared with only 4% in regrowth plots (Table 2). Indeed  
 103 a single large tree (>60 cm DBH) was recorded only once in a late-regrowth plot. This relationship  
 104 was also reflected in the decline in basal area of late-regrowth control plots (Figure 3), which was  
 105 associated with a decline on the proportion of large trees that accounted for a reduced 31% of the  
 106 basal area in late-regrowth control plots (Table 2).

107 **Relationships between forest structure, mammal diversity and environmental variables**



108 Mammal diversity varied considerably across the survey plots (Figure 4). There appeared to be  
109 a tendency for basal area to increase with mammal diversity in Late-regrowth plots, yet basal area  
110 was only weakly associated with mammal diversity within the different regrowth classes (Figure 4).  
111 Indeed, the diversity of mammals was found to be only weakly informative for explaining the basal  
112 area of trees across the 30 sample plots (Table 3).  
113

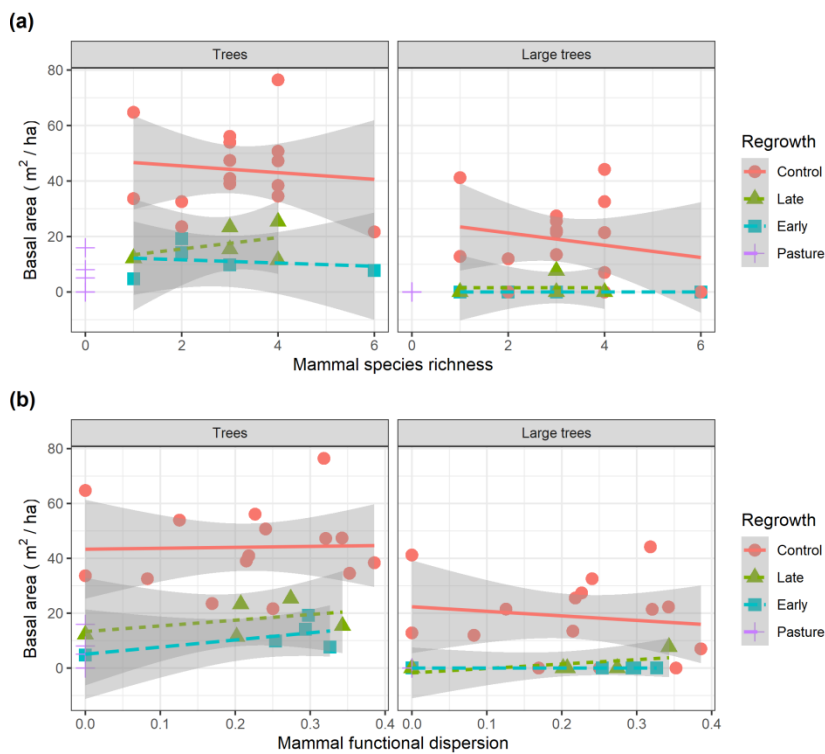

114 Figure 4. Mammal diversity and basal area across a lowland forest regrowth gradient. The basal area of (a) all  
115 and (b) large living trees were recorded together with the diversity (species richness and functional dispersion)  
116 of terrestrial mammals in 30 plots (15 control and 15 regrowth). Lines and shaded areas are mean values and  
117 95% confidence intervals from linear models illustrating trends in basal area with increasing mammal  
118 diversity. Points with different shapes represent different regrowth plot types.  
119

120  
121 Comparison of the models representing the alternative hypotheses showed that plot type  
122 (control v regrowth) and topography were the most important first ranked variables for the five forest  
123 structure attributes (Table 3). The most simple model including only plot type explained more than  
124 50% of model deviance for all forest structure attributes except for the number of trees (DBH>10  
125 cm). Plot type and regrowth class were both included in the 95% confidence set of models for the

126 basal area of large trees (Table 3). In contrast Topography was the most important (first ranked)  
127 model for the number of trees, proportion of small trees and tree basal area (Table 3). Mammal  
128 diversity, Time and Hydrography models were not well supported and were not included in the 95%  
129 confidence set of models for any of the forest structure attributes (Table 3).  
130

131 Table 3. Summary of the Generalized Linear Models created to explain forest structure in 30 plots  
 132 (15 control and 15 regrowth). Models ordered by decreasing AIC (Akaike Information Criterion)  
 133 values.

| Forest structure       | Model <sup>a</sup> | Dev. Exp | Loglik | BIC   | AIC   | $\Delta$ AIC | $W_i$ AIC <sup>b</sup> |
|------------------------|--------------------|----------|--------|-------|-------|--------------|------------------------|
| Trees                  |                    |          |        |       |       |              |                        |
|                        | Topography         | 60.5     | -100.6 | 231.9 | 219.3 | 0.0          | 0.91                   |
|                        | Regrowth class     | 49.8     | -105.1 | 234.1 | 224.3 | 5.0          | 0.07                   |
|                        | Mammals            | 51.3     | -104.7 | 240.0 | 227.3 | 8.1          | 0.02                   |
|                        | Hydrography        | 45.8     | -106.3 | 243.1 | 230.5 | 11.3         | 0.00                   |
|                        | Time               | 42.9     | -107.0 | 244.7 | 232.1 | 12.8         | 0.00                   |
|                        | Plot               | 6.5      | -114.4 | 239.1 | 234.9 | 15.6         | 0.00                   |
| Proportion small trees |                    |          |        |       |       |              |                        |
|                        | Topography         | 75.2     | -64.3  | 155.7 | 144.5 | 0.0          | 0.96                   |
|                        | Hydrography        | 70.4     | -67.5  | 162.2 | 151.0 | 6.5          | 0.04                   |
|                        | Mammals            | 66.4     | -70.2  | 167.6 | 156.4 | 11.9         | 0.00                   |
|                        | Time               | 65.1     | -71.0  | 169.3 | 158.1 | 13.6         | 0.00                   |
|                        | Plot               | 53.7     | -78.7  | 164.3 | 161.5 | 17.0         | 0.00                   |
|                        | Regrowth class     | 55.4     | -77.6  | 175.6 | 167.2 | 22.7         | 0.00                   |
| Proportion large trees |                    |          |        |       |       |              |                        |
|                        | Plot               | 54.9     | -30.5  | 67.8  | 65.0  | 0.0          | 0.88                   |
|                        | Regrowth class     | 60.6     | -28.9  | 78.2  | 69.8  | 4.8          | 0.08                   |
|                        | Mammals            | 62.9     | -28.3  | 83.7  | 72.5  | 2.8          | 0.02                   |
|                        | Time               | 62.8     | -28.3  | 83.8  | 72.5  | 2.8          | 0.02                   |
|                        | Topography         | 54.7     | -30.6  | 88.5  | 77.3  | 7.5          | 0.00                   |
|                        | Hydrography        | 52.8     | -31.1  | 89.5  | 78.3  | 8.5          | 0.00                   |
| BA all trees           |                    |          |        |       |       |              |                        |
|                        | Topography         | 80.7     | -100.9 | 232.3 | 220.4 | 0.0          | 0.89                   |
|                        | Regrowth class     | 72.9     | -105.8 | 235.4 | 225.6 | 5.2          | 0.06                   |
|                        | Plot               | 62.9     | -110.4 | 231.0 | 226.8 | 6.4          | 0.04                   |
|                        | Mammals            | 71.7     | -106.4 | 243.4 | 230.8 | 10.4         | 0.01                   |
|                        | Time               | 69.3     | -107.6 | 245.8 | 233.2 | 12.8         | 0.00                   |
|                        | Hydrography        | 66.0     | -109.1 | 248.8 | 236.2 | 15.9         | 0.00                   |
| BA large trees         |                    |          |        |       |       |              |                        |
|                        | Plot               | 58.3     | -61.5  | 133.1 | 128.9 | 0.0          | 0.87                   |
|                        | Regrowth class     | 67.1     | -59.9  | 143.5 | 133.7 | 4.8          | 0.08                   |
|                        | Hydrography        | 70.9     | -59.0  | 148.7 | 136.1 | 7.1          | 0.02                   |
|                        | Mammals            | 70.4     | -59.2  | 148.9 | 136.3 | 7.4          | 0.02                   |
|                        | Time               | 65.7     | -60.1  | 150.9 | 138.3 | 9.4          | 0.01                   |
|                        | Topography         | 60.8     | -61.0  | 152.7 | 140.1 | 11.2         | 0.00                   |

134 <sup>a</sup> Models used to explain forest structure. All models contained plot type (control/regrowth) as categorical  
 135 factor. Variables and associated estimates in the different models can be found as Supplementary Information  
 136 Table S2 online.

137 <sup>b</sup> Akaike weights ( $W_i$ ) from largest to smallest.

## 138 Discussion

139 We integrate field and remotely sensed data to establish support for multiple non-mutually exclusive  
140 hypotheses explaining patterns in forest structure across a lowland Amazon regrowth gradient. We  
141 establish that different hypotheses are supported for different structure attributes. Here we discuss  
142 these findings in terms of prospects for the passive restoration of degraded Amazon forests.

143 The mean basal area value from our 15 control plots ( $44.1 \text{ m}^2/\text{ha}$ ) was close to the mean from  
144 42 Guyana Shield forest plots ( $43.4 \text{ m}^2/\text{ha}$ , range  $10 - 65 \text{ m}^2/\text{ha}$ ) in French Guiana<sup>35</sup>. The results  
145 from Molto, et al.<sup>35</sup> were obtained from an extensive survey of  $0.5 - 1 \text{ ha}$  plots. Although our plot  
146 size was smaller compared to Molto, et al.<sup>35</sup>, the similarity in mean values suggests that our plots do  
147 provide a representative sample of forest structure in the regrowth areas. The basal areas obtained  
148 from our regrowth plots followed a similar trajectory to those reported from abandoned pasture in  
149 Costa Rica<sup>10</sup>, where the most recently abandoned pasture plots (<14 year) had mean basal area of  
150  $13.5 \text{ m}^2/\text{ha}$ , with basal area increasing to  $26.1 \text{ m}^2/\text{ha}$  after 21 – 30 year<sup>10</sup>. compared with 11.1 and  
151  $17.6 \text{ m}^2/\text{ha}$  respectively in our Early (1-5 year) and Late (20 – 25 year) regrowth plots. This also  
152 follows a similar pattern to values reported from 370 successional forest plots in the Brazilian  
153 Amazon, with basal area values typically  $< 10 \text{ m}^2/\text{ha}$  in early stages (< 5 year) and reaching  $25 \text{ m}^2/\text{ha}$   
154 after 15 years<sup>44</sup>.

155 Although results from lowland forest sites in Costa Rica suggest rapid recovery of pasture  
156 areas<sup>10</sup> this could be related to the substantially lower basal area in the seven old growth reference  
157 plots ( $26.1 \text{ m}^2/\text{ha}$ , range  $19.3 - 32.2 \text{ m}^2/\text{ha}$ ) compared with those in our study area. Our results are  
158 similar to those reported from the central Amazon, where 25 y of regrowth restored half of the  
159 mature-forest biomass<sup>41</sup>. A recent analysis of 45 Neotropical secondary forest study sites found that  
160 secondary forests in the lowland tropics reach 90 percent of old growth biomass in a median time of  
161 66 yr<sup>13</sup>. Our findings do suggest nuanced difference in successional trajectories. Basal area increased  
162 rapidly in early regrowth stages and this could be explained by the less intensive land use (i.e. lack of

163 pasture) and the proximity to large areas of intact forest. In contrast basal area of late-regrowth areas  
164 was less than those reported from other areas<sup>10,44</sup>. This could be related to soil productivity, as  
165 previous studies show that highly diverse Guyana Shield wet forests can take longer to establish<sup>13</sup>.  
166 With basal area of control plots dominated by large trees it seems likely that many decades will be  
167 necessary for forest structure (total basal area, proportion of large trees) to return to pre-disturbance  
168 values.

169 The success of active and passive restoration can depend on ecological conditions<sup>45</sup>. We found  
170 topography was the most informative model for explaining patterns in number of trees, tree basal  
171 area and proportion of small trees (Table 3, Figure 2). Differences in altitude and slope have been  
172 shown to affect floristic structure of tropical forests from local to regional scales<sup>16,35,42,46-48</sup>. Indeed,  
173 even relatively small variations in topography can generate changes in local-scale soil chemistry,  
174 hydrology and microclimate<sup>46,49</sup>. The effects of topography do not operate in isolation from  
175 hydrology and the increased numbers of small trees and tree biomass with increasing altitude (Figure  
176 3) agree with previous studies that show trees grow more slowly in more low lying (and often more  
177 waterlogged) terrain<sup>42</sup>.

178 We found a weak association between mammal diversity and regrowth forest structure.  
179 Previous studies in a nearby protected area show that this group of mammals (mid- to large-bodied  
180 Artiodactyla, Perissodactyla and Rodentia) are more strongly associated with factors such as access  
181 to water<sup>50</sup> and altitude<sup>50,51</sup>. A recent study also showed that mammal abundances were more  
182 strongly associated with phenology (fruit fall) than basal area along 10 km of forest in the western  
183 Guyana Shield<sup>52</sup>. Additionally, regrowth class was found to be the primary driver of mammal species  
184 encountered independent of forest cover<sup>53</sup>. For example the number of species detected in control  
185 and regrowth plots (all with forest cover >87%) varied between 1 and 6 (Figure 4). Mid- to large-  
186 bodied seed dispersers are a critical component of Amazon forests<sup>18,19,25</sup> and are also widespread  
187 and ubiquitous across myriad Amazonian forest types<sup>54-56</sup>. The eight species are therefore not

188 strictly dependent on the quality of forest habitat compared with other more specialist groups such as  
189 primates<sup>57</sup>. The lack of a strong relationship between diversity of these eight mammal seed  
190 dispersers and forest structure attributes (i.e. overall basal area and proportion of small trees) is  
191 therefore to be expected.

192 Decades of research show that myriad edge effects can extend up to 150 m in fragmented  
193 Amazon forests<sup>58,59</sup>. Considering the range of expected edge-effects it is highly probable that the  
194 natural regeneration and/or restoration of regrowth habitats in Amazon small-holdings (typically <  
195 100 ha) will strongly depend on species ecological responses to habitat edges<sup>60</sup>. Previous studies  
196 show that edge effects increase mortality of large trees, which in turn has major impacts on forest  
197 ecosystems<sup>61</sup>. In highly fragmented areas edge-effects can drive tree communities through a process  
198 of “retrogressive succession”<sup>62</sup> and toward an early successional state that may persist indefinitely.  
199 This early successional state can be characterized by functional and structural differences in that  
200 larger slower-growing tree species with high wood density tend to decline whereas faster-growing  
201 tree and liana species with lower wood density increase<sup>62,63</sup>. The decline in the number and basal  
202 area of large trees from our control plots along 20-25 year old edges suggest that retrogressive  
203 succession may establish even in relatively un-fragmented areas surrounded by extensive forest  
204 cover.

205 Our findings provide an early warning that even under a best case scenario there is potential for  
206 “retrogressive succession”. We found not only a lack of large trees in regrowth plots but also that  
207 large tree basal declined in older late-regrowth control plots. We suggest that this decline in large  
208 trees may be the primary driver of differences between regrowth and old growth forest and as such  
209 represent an unquantified component of resilience and time to recovery of Neotropical secondary  
210 forests. We also suggest that the continued presence of mid- and large bodied mammal seed  
211 dispersers in the study area are likely to be vital in order to avoid such “retrogressive succession”.

## 212 **Methods**

### 213 **Ethics Statement**

214 All methods were carried out in accordance with relevant guidelines and regulations. Fieldwork and  
215 data collection was conducted under research permit numbers SISBIO 40355–1, 47859-1 and 47859-  
216 2 to DN, issued by the Brazilian Ministério do Meio Ambiente (“MMA”). Data collection used non-  
217 invasive, remotely activated camera traps and did not involve direct contact or interaction with  
218 animals, thus no ethical approval was required. Interviews with local residents were approved by  
219 Brazilian Ministério do Meio Ambiente (SISBIO permits 45034-1, 45034-2, 45034-3) and the Ethics  
220 Committee in Research from the Federal University of Amapá (UNIFAP) (CAAE  
221 42064815.5.0000.0003, Permit number 1.013.843). Interviews were conducted with residents that  
222 were both (1) willing to be interviewed (written informed consent was obtained from all interviewees) and (2)  
223 aware of the site history.

224

### 225 **Study area**

226 Our study took place in 15 areas of regrowth on small holder properties<sup>53,64</sup> in the center of the State  
227 of Amapá (Figure 5). The regional climate is classified by Koppen-Geiger as Am (Equatorial  
228 monsoon)<sup>65</sup>, with annual rainfall greater than 2500 mm<sup>66</sup>. The driest months are September to  
229 November (total monthly rainfall < 150 mm) and the wettest months from February to April (total  
230 monthly rainfall > 300 mm)<sup>66</sup>. The State of Amapá has the lowest deforestation rate in Brazil and >  
231 70% of the Amapá receives some form of legal protection. There is no large scale agricultural  
232 developments or monocultures along the waterways and properties retain typically small (< 1000 ha)  
233 areas of opened land, which are cleared for small scale family agriculture, which focuses on acai,  
234 small scale production of fruits and vegetables for sustenance and limited commercial sale of  
235 regional produce (e.g. manioc flour) in local markets. There are some 54 properties upstream of the  
236 nearest town (Porto Grande<sup>67</sup>). There has never been any expansive clearcutting in the region and

237 there are no monocultures (e.g. soy) or cattle production. All sites were at least 26 km from the  
238 nearest town by river, and all sites are surrounded by matrix of continuous closed canopy forest  
239 cover (Table 2). Pesticides and/or herbicides had never been used at any of the sites.

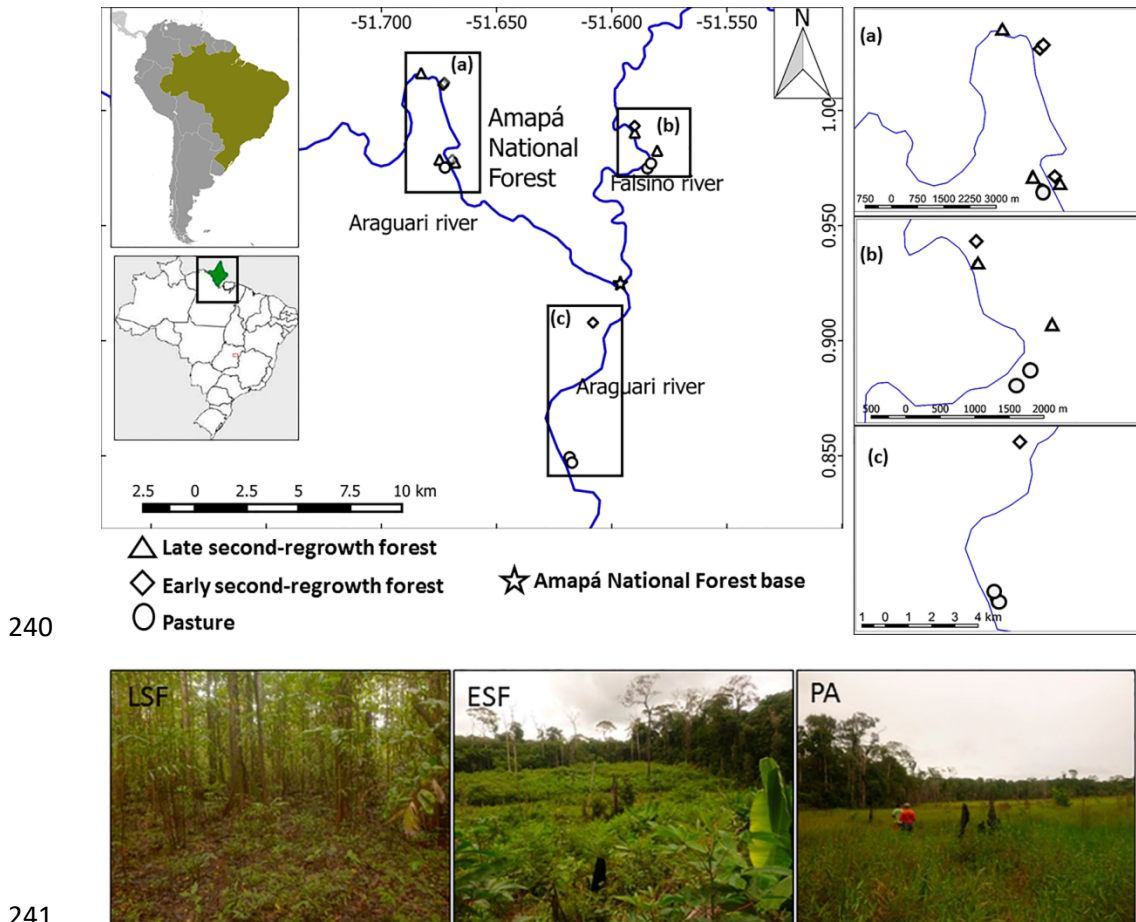

242 **Fig. 5.** Map of the study area in the eastern Amazon. Showing the location of 15 study sites,  
243 grouped into three regrowth stages in the small holder properties close to rivers (solid blue lines): late  
244 second-regrowth forest (LSF, triangles), early second-regrowth forest (ESF, squares) and pasture  
245 (PA, circles).  
246

247 A described previously<sup>53,64</sup> the 15 small-holder properties were selected based on differences in  
248 land-use histories and forest succession/regrowth stage. All sites were close (110 – 554m, Table 2) to  
249 100 – 200 m wide rivers that are navigable by motorized boats, but due to riverbank formation the  
250 sites are never flooded. These 15 sites were grouped into three regrowth classes based on the land-  
251 use history: late second-regrowth forest (N = 5, most recent human disturbance between 20 and 25  
252 years), early second-regrowth (N = 5, most recent human disturbance between 1 and 5 years), and



253 pasture (N = 5, recently cleared and abandoned pasture areas dominated by grasses/herbs but that had  
254 never been used to raise livestock, with the most recent disturbance between 1 and 17 years). Each of  
255 the 15 regrowth sites was paired with a nearby (60 to 150 m) control site i.e. 20 – 30 m tall *terra-*  
256 *firme* forest site without a history of mechanized timber extraction. To reduce the possible  
257 confounding influence of edge effects that are known to strongly influence the distribution of trees in  
258 Neotropical forests, all regrowth and control sites were established at a standardized distance  
259 (approximately 30 m) from the nearest control-regrowth habitat edge.

260

## 261 **Forest structure**

262 Data were collected from May to August 2016. Forest structure data (i.e., number of trees and  
263 basal area) were obtained from plots measuring 50 x 10 m (500 m<sup>2</sup>), at each of the 30 points, totaling  
264 1.5 hectare. This plot size was selected as it has been widely used to examine structural changes in  
265 tropical forests<sup>19,41,42,68</sup> and several of the regrowth areas were too small (Table 2) to enable the  
266 establishment of larger spatially independent plots. We obtained five measures (responses) to  
267 characterize the forest structure in each plot. These were selected based on previous studies that  
268 show their appropriateness to distinguish attributes of regrowth/successional stages related to  
269 biodiversity of Amazon forests<sup>13,44,69,70</sup>. The number of all trees  $\geq 10$  cm DBH (diameter at breast  
270 height at a standard 1.3 m above ground, or above tallest root buttress) was used to quantify the  
271 number of trees per area in each plot (m<sup>2</sup>). This count included all trees which had at least half of  
272 their basal trunk inside the plot. The proportion of small (10 – 20 cm DBH) trees was calculated to  
273 represent the expected increase of younger trees in regrowth areas. The proportion of large (>60 cm  
274 DBH) trees was calculated as this is known as an important characteristic of mature/late succession  
275 areas<sup>44,70</sup>. We also calculated the basal area of all and large trees as this is known to be strongly  
276 correlated with tree biomass<sup>71</sup>. For example basal area and biomass were > 99% correlated in 23  
277 plots from lowland Costa Rica<sup>10</sup>.

278

## 279 **Explanatory variables**

280 We investigated predictions from multiple non-mutually exclusive hypotheses to explain  
281 patterns in basal area (Table 1). A total of 10 variables were used to form models to represent 5  
282 working hypotheses (topography, hydrography, regrowth class, time and mammal diversity) that  
283 based on the findings from previous studies were likely to explain the observed patterns<sup>10,13,28,40,41,72</sup>.  
284 We chose to work with mainstream, widely available environmental variables. Four of these (the  
285 topographic and hydrographic model variables) were computed from remotely sensed digital terrain  
286 model (SRTM-DTM): altitude (masl), slope, TWI (Topographic wetness index), DND (Distance to  
287 Network Drainage) calculated from the interaction between HAND (Height above network drainage)  
288 and HDND (Horizontal distance to network drainage). The time model included years since the  
289 regrowth site was opened and years since last use, both of which were obtained from interviews with  
290 local landowners.

291 Mammal functional diversity was obtained from a camera-trap survey conducted at the same  
292 time (May to September 2016) and in the same plots as forest structure was sampled<sup>53</sup>. Camera traps  
293 equipped with infrared triggers (Bushnell Trophy Cam, 8MP, Overland Park, KS, USA) were  
294 installed in each of the 30 plots following standardized protocols<sup>50,51,73</sup>. This camera trap survey [full  
295 details provide in<sup>53</sup>] including a sampling effort of 827 camera-trap days (450 and 377 camera-trap  
296 days, control and regrowth sites respectively) was used to estimate functional diversity of eight  
297 terrestrial mammal seed dispersers (*Cuniculus paca*, *Dasyprocta leporina*, *Myoprocta acouchy*,  
298 *Mazama americana*, *M. nemorivaga*, *Pecari tajacu*, *Tayassu pecari* and *Tapirus terrestris*).

299

## 300 **Data analysis**

301 Tree Basal Area in each plot was obtained as the sum of the basal area value for each  
302 individual tree derived from the DBH of each tree following the formula  $BA$  (basal area in  $m^2$ )=

303 0.00007854 X DBH<sup>2</sup> (constant obtained by solving the following equation to obtain BA in m<sup>2</sup> from  
304 the DBH measured in cm <sup>69</sup>):

$$BA = \frac{\pi \times (DBH/2)^2}{10000}$$

305 We calculated basal area of all and large (>60cm DBH) living trees <sup>69,70,72</sup>. We also calculated the  
306 proportion of small stems (10 – 20 cm DBH trees) as this has been shown to be an important  
307 measure of stand structure in forest regrowth areas <sup>35,69</sup>.

308 To represent diversity of terrestrial mammal seed dispersers we calculated a richness and  
309 functional diversity (FD) value for each of the 30 plots <sup>53</sup>. Richness was calculated as the observed  
310 number of species (hereafter “species richness”) at each plot. Although there are many diversity  
311 metrics, we chose species richness as it is widely used and clearly interpretable <sup>74,75</sup> and with  
312 relatively few (eight) species and 30 plots there were strong correlations between species richness  
313 values and alternative diversity metrics such as Shannon and Simpson diversity (Spearman rho >  
314 0.89). We used Functional Dispersion (FDis) <sup>76</sup> as an index of functional diversity as it is not  
315 strongly influenced by outliers, accounts for relative abundances, is unaffected by species richness  
316 and can be calculated from any distance/dissimilarity measure <sup>76,77</sup>. Functional Dispersion was  
317 estimated with the dbFD function <sup>77</sup> using default settings.

318 To examine patterns in forest structure attributes we used Generalized Linear Models. We used  
319 an information theoretic model averaging framework <sup>78</sup> to examine the support for five models  
320 representing the five non-mutually exclusive hypotheses – topography, hydrography, regrowth class,  
321 time and mammal diversity (see Table 1 for variable description and ecological relevance). We  
322 evaluated models based on their information content, as measured by AIC – Akaike Information  
323 Criterion. The relative importance of the models was measured by the models Akaike weights  
324 (Burnham & Anderson 2002 pp. 75-77, 167-172), which is a scaled measure of the likelihood ratio

325 that ranges between 0 (least important) and 1 (most important). None of the unexplained variation  
326 (model residuals) was related to the geographic distance among plots so we did not need to control  
327 for spatial dependence. All analysis were conducted using the R language and environment for  
328 statistical computing <sup>79</sup>, with base functions and functions available in the following packages: vegan  
329 <sup>80</sup>, ggplot2 <sup>81</sup>, MuMIn <sup>82</sup>, and tweedie <sup>83</sup>.

330

331

## 332 Data Availability Statement

333 The raw forest structure and environmental data used in the analysis of this study have been  
334 deposited in the OSF - Center for Open Science at DOI: 10.17605/OSF.IO/MC27U.

335

## 336 References

- 337 1 Hansen, M. C. *et al.* High-Resolution Global Maps of 21st-Century Forest Cover Change. *Science* **342**,  
338 850-853, doi:<https://doi.org/10.1126/science.1244693> (2013).
- 339 2 Chazdon, R. L. & Guariguata, M. R. Natural regeneration as a tool for large-scale forest restoration in  
340 the tropics: prospects and challenges. *Biotropica* **48**, 716–730,  
341 doi:<https://doi.org/10.1111/btp.12381> (2016).
- 342 3 Holl, K. D. Restoring tropical forests from the bottom up. *Science* **355**, 455-456,  
343 doi:<https://doi.org/10.1126/science.aam5432> (2017).
- 344 4 Brancalion, P. H. S. *et al.* Balancing economic costs and ecological outcomes of passive and active  
345 restoration in agricultural landscapes: the case of Brazil. *Biotropica* **48**, 856-867,  
346 doi:<https://doi.org/10.1111/btp.12383> (2016).
- 347 5 Foley, J. A. *et al.* Amazonia revealed: forest degradation and loss of ecosystem goods and services in  
348 the Amazon Basin. *Frontiers in Ecology and the Environment* **5**, 25-32, doi:[https://doi.org/10.1890/1540-9295\(2007\)5\[25:ARFDAL\]2.0.CO;2](https://doi.org/10.1890/1540-9295(2007)5[25:ARFDAL]2.0.CO;2) (2007).
- 350 6 Montibeller, B., Kmoch, A., Virro, H., Mander, Ü. & Uuemaa, E. Increasing fragmentation of forest  
351 cover in Brazil's Legal Amazon from 2001 to 2017. *Scientific Reports* **10**, 5803,  
352 doi:<https://doi.org/10.1038/s41598-020-62591-x> (2020).
- 353 7 Csillik, O., Kumar, P., Mascaro, J., O'Shea, T. & Asner, G. P. Monitoring tropical forest carbon stocks  
354 and emissions using Planet satellite data. *Scientific Reports* **9**, 17831, doi:<https://doi.org/10.1038/s41598-019-54386-6> (2019).
- 356 8 Nunes, S. *et al.* Uncertainties in assessing the extent and legal compliance status of riparian forests  
357 in the eastern Brazilian Amazon. *Land Use Policy* **82**, 37-47,  
358 doi:<https://doi.org/10.1016/j.landusepol.2018.11.051> (2019).
- 359 9 Rocha, G. P. E., Vieira, D. L. M. & Simon, M. F. Fast natural regeneration in abandoned pastures in  
360 southern Amazonia. *Forest Ecology and Management* **370**, 93-101,  
361 doi:<https://doi.org/10.1016/j.foreco.2016.03.057> (2016).
- 362 10 Letcher, S. G. & Chazdon, R. L. Rapid Recovery of Biomass, Species Richness, and Species  
363 Composition in a Forest Chronosequence in Northeastern Costa Rica. *Biotropica* **41**, 608-617,  
364 doi:<https://doi.org/10.1111/j.1744-7429.2009.00517.x> (2009).
- 365 11 Fearnside, P. M. Deforestation in Brazilian Amazonia: History, Rates, and Consequences.  
366 *Conservation Biology* **19**, 680-688, doi:<https://doi.org/10.1111/j.1523-1739.2005.00697.x> (2005).
- 367 12 Laurance, W. F. *et al.* Rain forest fragmentation and the proliferation of successional trees. *Ecology*  
368 **87**, 469-482, doi:<https://doi.org/10.1890/05-0064> (2006).
- 369 13 Poorter, L. *et al.* Biomass resilience of Neotropical secondary forests. *Nature* **530**, 211-214,  
370 doi:<https://doi.org/10.1038/nature16512> (2016).
- 371 14 Camargo, J. L. C., Ferraz, I. D. K. & Imakawa, A. M. Rehabilitation of degraded areas of central  
372 Amazonia using direct sowing of forest tree seeds. *Restoration Ecology* **10**, 636-644,  
373 doi:<https://doi.org/10.1046/j.1526-100X.2002.01044.x> (2002).
- 374 15 Guariguata, M. R. & Ostertag, R. Neotropical secondary forest succession: changes in structural and  
375 functional characteristics. *Forest ecology and management* **148**, 185-206,  
376 doi:[https://doi.org/10.1016/S0378-1127\(00\)00535-1](https://doi.org/10.1016/S0378-1127(00)00535-1) (2001).

- 377 16 Crouzeilles, R. *et al.* A global meta-analysis on the ecological drivers of forest restoration success.  
378 *Nature Communications* **7**, 11666, doi:[https://10.1038/ncomms11666](https://doi.org/10.1038/ncomms11666) (2016).
- 379 17 Chazdon, R. L. *et al.* The Potential for Species Conservation in Tropical Secondary Forests.  
380 *Conservation Biology* **23**, 1406-1417, doi:[https://10.1111/j.1523-1739.2009.01338.x](https://doi.org/10.1111/j.1523-1739.2009.01338.x) (2009).
- 381 18 Peres, C. A., Emilio, T., Schiatti, J., Desmouliere, S. J. & Levi, T. Dispersal limitation induces long-term  
382 biomass collapse in overhunted Amazonian forests. *Proceedings of the National Academy of Sciences*  
383 *of the United States of America* **113**, 892-897, doi:[https://10.1073/pnas.1516525113](https://doi.org/10.1073/pnas.1516525113) (2016).
- 384 19 Pessoa, M. S. *et al.* Deforestation drives functional diversity and fruit quality changes in a tropical  
385 tree assemblage. *Perspectives in Plant Ecology, Evolution and Systematics* **28**, 78-86,  
386 doi:<https://doi.org/10.1016/j.ppees.2017.09.001> (2017).
- 387 20 Bowen, M. E., McAlpine, C. A., House, A. P. & Smith, G. C. Regrowth forests on abandoned  
388 agricultural land: a review of their habitat values for recovering forest fauna. *Biological Conservation*  
389 **140**, 273-296, doi:<http://dx.doi.org/10.1016/j.biocon.2007.08.012> (2007).
- 390 21 Chazdon, R. L. & Uriarte, M. Natural regeneration in the context of large-scale forest and landscape  
391 restoration in the tropics. *Biotropica* **48**, 709-715, doi:<http://dx.doi.org/10.1111/btp.12409> (2016).
- 392 22 Neuschulz, E. L., Mueller, T., Schleuning, M. & Böhning-Gaese, K. Pollination and seed dispersal are  
393 the most threatened processes of plant regeneration. *Scientific Reports* **6**, 29839,  
394 doi:10.1038/srep29839 (2016).
- 395 23 Stoner, K. E., Riba-Hernández, P., Vulinec, K. & Lambert, J. E. The role of mammals in creating and  
396 modifying seedshadows in tropical forests and some possible consequences of their elimination.  
397 *Biotropica* **39**, 316-327, doi:<http://dx.doi.org/10.1111/j.1744-7429.2007.00292.x> (2007).
- 398 24 Griffiths, H. M., Bardgett, R. D., Louzada, J. & Barlow, J. The value of trophic interactions for  
399 ecosystem function: dung beetle communities influence seed burial and seedling recruitment in  
400 tropical forests. *Proceedings of the Royal Society B* **283**, 20161634,  
401 doi:<http://dx.doi.org/10.1098/rspb.2016.1634> (2016).
- 402 25 Asquith, N. M. & Mejía-Chang, M. Mammals, edge effects, and the loss of tropical forest diversity.  
403 *Ecology* **86**, 379-390, doi:<http://dx.doi.org/10.1890/03-0575> (2005).
- 404 26 Beck, H., Snodgrass, J. W. & Thebpanya, P. Long-term exclosure of large terrestrial vertebrates:  
405 Implications of defaunation for seedling demographics in the Amazon rainforest. *Biological*  
406 *Conservation* **163**, 115-121, doi:<http://dx.doi.org/10.1016/j.biocon.2013.03.012> (2013).
- 407 27 Paine, C. E., Beck, H. & Terborgh, J. How mammalian predation contributes to tropical tree  
408 community structure. *Ecology* **97**, 3326-3336, doi:<https://doi.org/10.1002/ecy.1586> (2016).
- 409 28 Sobral, M. *et al.* Mammal diversity influences the carbon cycle through trophic interactions in the  
410 Amazon. *Nature Ecology & Evolution* **1**, 1670-1676, doi:[https://10.1038/s41559-017-0334-0](https://doi.org/10.1038/s41559-017-0334-0) (2017).
- 411 29 Bascompte, J. & Jordano, P. Plant-animal mutualistic networks: the architecture of biodiversity.  
412 *Annual Review of Ecology, Evolution, and Systematics* **38**, 567-593,  
413 doi:<http://dx.doi.org/10.1146/annurev.ecolsys.38.091206.095818> (2007).
- 414 30 Wunderle, J. M. The role of animal seed dispersal in accelerating native forest regeneration on  
415 degraded tropical lands. *Forest Ecology and Management* **99**, 223-235,  
416 doi:[http://dx.doi.org/10.1016/S0378-1127\(97\)00208-9](http://dx.doi.org/10.1016/S0378-1127(97)00208-9) (1997).
- 417 31 Fragoso, J. M. V. Tapir-Generated Seed Shadows: Scale-Dependent Patchiness in the Amazon Rain  
418 Forest. *Journal of Ecology* **85**, 519-529, doi:<http://dx.doi.org/10.2307/2960574> (1997).
- 419 32 Hibert, F. *et al.* Unveiling the diet of elusive rainforest herbivores in next generation sequencing era?  
420 The tapir as a case study. *PLoS One* **8**, e60799, doi:<http://dx.doi.org/10.1371/journal.pone.0060799>  
421 (2013).
- 422 33 Terborgh, J. *et al.* Tree recruitment in an empty forest. *Ecology* **89**, 1757-1768,  
423 doi:<http://dx.doi.org/10.1890/07-0479.1> (2008).
- 424 34 Wright, S. J. *et al.* The plight of large animals in tropical forests and the consequences for plant  
425 regeneration. *Biotropica* **39**, 289-291, doi:<http://dx.doi.org/10.1111/j.1744-7429.2007.00293.x>  
426 (2007).

- 427 35 Molto, Q. *et al.* Predicting tree heights for biomass estimates in tropical forests; a test from French  
428 Guiana. *Biogeosciences* **11**, 3121-3130, doi:[https://10.5194/bg-11-3121-2014](https://doi.org/10.5194/bg-11-3121-2014) (2014).
- 429 36 Körner, C. The use of 'altitude' in ecological research. *Trends in Ecology & Evolution* **22**, 569-574,  
430 doi:<https://doi.org/10.1016/j.tree.2007.09.006> (2007).
- 431 37 Beven, K. & Kirkby, M. J. A physically based, variable contributing area model of basin hydrology.  
432 *Hydrological Sciences Journal* **24**, 43-69, doi:<https://doi.org/10.1080/02626667909491834> (1979).
- 433 38 Campling, P., Gobin, A. & Feyen, J. Logistic Modeling to Spatially Predict the Probability of Soil  
434 Drainage Classes. *Soil Science Society of America Journal* **66**, 1390-1401,  
435 doi:<https://10.2136/sssaj2002.1390> (2002).
- 436 39 Nobre, A. D. *et al.* Height Above the Nearest Drainage – a hydrologically relevant new terrain model.  
437 *Journal of Hydrology* **404**, 13-29, doi:<http://dx.doi.org/10.1016/j.jhydrol.2011.03.051> (2011).
- 438 40 Schiatti, J. *et al.* Vertical distance from drainage drives floristic composition changes in an Amazonian  
439 rainforest. *Plant Ecology & Diversity* **7**, 241-253, doi:<https://10.1080/17550874.2013.783642> (2014).
- 440 41 Gehring, C., Denich, M. & Vlek, P. L. G. Resilience of secondary forest regrowth after slash-and-burn  
441 agriculture in central Amazonia. *Journal of Tropical Ecology* **21**, 519-527,  
442 doi:<https://10.1017/S0266467405002543> (2005).
- 443 42 Feldpausch, T. R., Riha, S. J., Fernandes, E. C. M. & Wandelli, E. V. Development of Forest Structure  
444 and Leaf Area in Secondary Forests Regenerating on Abandoned Pastures in Central Amazônia. *Earth*  
445 *Interactions* **9**, 1-22, doi:<https://10.1175/EI140.1> (2005).
- 446 43 Luskin, M. S., Ickes, K., Yao, T. L. & Davies, S. J. Wildlife differentially affect tree and liana  
447 regeneration in a tropical forest: An 18-year study of experimental terrestrial defaunation versus  
448 artificially abundant herbivores. *Journal of Applied Ecology* **56**, 1379-1388,  
449 doi:<https://10.1111/1365-2664.13378> (2019).
- 450 44 Lu, D., Mausel, P., Brondízio, E. & Moran, E. Classification of successional forest stages in the  
451 Brazilian Amazon basin. *Forest Ecology and Management* **181**, 301-312,  
452 doi:[https://doi.org/10.1016/S0378-1127\(03\)00003-3](https://doi.org/10.1016/S0378-1127(03)00003-3) (2003).
- 453 45 Crouzeilles, R. *et al.* Ecological restoration success is higher for natural regeneration than for active  
454 restoration in tropical forests. *Science Advances* **3**, e1701345, doi:<https://10.1126/sciadv.1701345>  
455 (2017).
- 456 46 de Castilho, C. V. *et al.* Variation in aboveground tree live biomass in a central Amazonian Forest:  
457 Effects of soil and topography. *Forest Ecology and Management* **234**, 85-96,  
458 doi:<https://doi.org/10.1016/j.foreco.2006.06.024> (2006).
- 459 47 Jucker, T. *et al.* Topography shapes the structure, composition and function of tropical forest  
460 landscapes. *Ecology Letters* **21**, 989-1000, doi:<https://10.1111/ele.12964> (2018).
- 461 48 Fortunel, C. *et al.* Topography and neighborhood crowding can interact to shape species growth and  
462 distribution in a diverse Amazonian forest. *Ecology* **99**, 2272-2283, doi:<https://10.1002/ecy.2441>  
463 (2018).
- 464 49 Tiessen, H., Chacon, P. & Cuevas, E. Phosphorus and nitrogen status in soils and vegetation along a  
465 toposequence of dystrophic rainforests on the upper Rio Negro. *Oecologia* **99**, 145-150,  
466 doi:<https://10.1007/BF00317095> (1994).
- 467 50 Paredes, O. S. L., Norris, D., Oliveira, T. G. d. & Michalski, F. Water availability not fruitfall modulates  
468 the dry season distribution of frugivorous terrestrial vertebrates in a lowland Amazon forest. *PLOS*  
469 *ONE* **12**, e0174049, doi:<http://dx.doi.org/10.1371/journal.pone.0174049> (2017).
- 470 51 Michalski, L. J., Norris, D., de Oliveira, T. G. & Michalski, F. Ecological relationships of meso-scale  
471 distribution in 25 neotropical vertebrate species. *PLoS One* **10**, e0126114,  
472 doi:<http://dx.doi.org/10.1371/journal.pone.0126114> (2015).
- 473 52 Mendes Pontes, A. R. Tree reproductive phenology determines the abundance of medium-sized and  
474 large mammalian assemblages in the Guyana shield of the Brazilian Amazonia. *Animal Biodiversity*  
475 *and Conservation* **43.1**, 9-26, doi:<https://doi.org/10.32800/abc.2020.43.0009> (2020).

- 476 53 Arévalo-Sandi, A., Bobrowiec, P. E. D., Rodriguez Chuma, V. J. U. & Norris, D. Diversity of terrestrial  
477 mammal seed dispersers along a lowland Amazon forest regrowth gradient. *PLOS ONE* **13**,  
478 e0193752, doi:<https://10.1371/journal.pone.0193752> (2018).
- 479 54 Arita, H. T., Robinson, J. G. & H REDFORD, K. Rarity in Neotropical forest mammals and its ecological  
480 correlates. *Conservation Biology* **4**, 181-192, doi:[http://dx.doi.org/10.1111/j.1523-](http://dx.doi.org/10.1111/j.1523-1739.1990.tb00107.x)  
481 [1739.1990.tb00107.x](http://dx.doi.org/10.1111/j.1523-1739.1990.tb00107.x) (1990).
- 482 55 Peres, C. A. & Palacios, E. Basin-wide effects of game harvest on vertebrate population densities in  
483 Amazonian forests: Implications for animal-mediated seed dispersal. *Biotropica* **39**, 304-315,  
484 doi:<http://dx.doi.org/10.1111/j.1744-7429.2007.00272.x> (2007).
- 485 56 Emmons, L. H. & Feer, F. *Neotropical rainforest mammals: A field guide.*, (The University of Chicago  
486 Press, 1997).
- 487 57 Michalski, F., Michalski, L. J. & Barnett, A. A. Environmental determinants and use of space by six  
488 Neotropical primates in the northern Brazilian Amazon. *Studies on Neotropical Fauna and*  
489 *Environment* **52**, 187-197, doi:<https://10.1080/01650521.2017.1335276> (2017).
- 490 58 Laurance, W. F. *et al.* Ecosystem Decay of Amazonian Forest Fragments: a 22-Year Investigation.  
491 *Conservation Biology* **16**, 605-618, doi:<http://dx.doi.org/10.1046/j.1523-1739.2002.01025.x> (2002).
- 492 59 Norris, D., Peres, C. A., Michalski, F. & Hinchsliffe, K. Terrestrial mammal responses to edges in  
493 Amazonian forest patches: a study based on track stations. *Mammalia* **72**, 15-23,  
494 doi:<https://10.1515/mamm.2008.002> (2008).
- 495 60 Martínez-Ramos, M. *et al.* Natural forest regeneration and ecological restoration in human-modified  
496 tropical landscapes. *Biotropica* **48**, 745-757, doi:<http://dx.doi.org/10.1111/btp.12382> (2016).
- 497 61 Laurance, W. F., Delamônica, P., Laurance, S. G., Vasconcelos, H. L. & Lovejoy, T. E. Rainforest  
498 fragmentation kills big trees. *Nature* **404**, 836-836, doi:<https://10.1038/35009032> (2000).
- 499 62 Tabarelli, M., Lopes, A. V. & Peres, C. A. Edge-effects Drive Tropical Forest Fragments Towards an  
500 Early-Successional System. *Biotropica* **40**, 657-661, doi:<https://10.1111/j.1744-7429.2008.00454.x>  
501 (2008).
- 502 63 Santos, B. A. *et al.* Drastic erosion in functional attributes of tree assemblages in Atlantic forest  
503 fragments of northeastern Brazil. *Biological Conservation* **141**, 249-260,  
504 doi:<https://doi.org/10.1016/j.biocon.2007.09.018> (2008).
- 505 64 Arévalo-Sandi, A. R. & Norris, D. Short term patterns of germination in response to litter clearing and  
506 exclosure of large terrestrial vertebrates along an Amazon forest regrowth gradient. *Global Ecology*  
507 *and Conservation* **13**, e00371, doi:<https://doi.org/10.1016/j.gecco.2017.e00371> (2018).
- 508 65 Kottek, M., Grieser, J., Beck, C., Rudolf, B. & Rubel, F. World map of the Köppen-Geiger climate  
509 classification updated. *Meteorologische Zeitschrift* **15**, 259-263, doi:[http://dx.doi.org/10.1127/0941-](http://dx.doi.org/10.1127/0941-2948/2006/0130)  
510 [2948/2006/0130](http://dx.doi.org/10.1127/0941-2948/2006/0130) (2006).
- 511 66 ANA. *Sistema de Monitoramento Hidrológico (Hydrological Monitoring System)*. Agência Nacional de  
512 Águas[*[nl]*]National Water Agency, Available at <http://www.hidroweb.ana.gov.br>, (2017).
- 513 67 Norris, D. & Michalski, F. Socio-economic and spatial determinants of anthropogenic predation on  
514 Yellow-spotted River Turtle, *Podocnemis unifilis* (Testudines: Pelomedusidae), nests in the Brazilian  
515 Amazon: Implications for sustainable conservation and management. *Zoologia (Curitiba)* **30**, 482-  
516 490, doi:<http://dx.doi.org/10.1590/S1984-46702013000500003> (2013).
- 517 68 Yirdaw, E., Monge Monge, A., Austin, D. & Toure, I. Recovery of floristic diversity, composition and  
518 structure of regrowth forests on fallow lands: implications for conservation and restoration of  
519 degraded forest lands in Laos. *New Forests* **50**, 1007-1026, doi:<https://10.1007/s11056-019-09711-2>  
520 (2019).
- 521 69 McElhinny, C., Gibbons, P., Brack, C. & Bauhus, J. Forest and woodland stand structural complexity:  
522 Its definition and measurement. *Forest Ecology and Management* **218**, 1-24,  
523 doi:<https://doi.org/10.1016/j.foreco.2005.08.034> (2005).
- 524 70 Sist, P., Mazzei, L., Blanc, L. & Rutishauser, E. Large trees as key elements of carbon storage and  
525 dynamics after selective logging in the Eastern Amazon. *Forest Ecology and Management* **318**, 103-  
526 109, doi:<https://doi.org/10.1016/j.foreco.2014.01.005> (2014).



- 527 71 Phillips, O. L. *et al.* Species Matter: Wood Density Influences Tropical Forest Biomass at Multiple  
528 Scales. *Surveys in Geophysics* **40**, 913-935, doi:<https://10.1007/s10712-019-09540-0> (2019).
- 529 72 Bastin, J.-F. *et al.* Pan-tropical prediction of forest structure from the largest trees. *Global Ecology*  
530 *and Biogeography* **27**, 1366-1383, doi:<https://10.1111/geb.12803> (2018).
- 531 73 TEAM Network. 69 (Tropical Ecology, Assessment and Monitoring Network, Center for Applied  
532 Biodiversity Science, Conservation International., Arlington, VA, USA., 2011).
- 533 74 Hortal, J., Borges, P. A. & Gaspar, C. Evaluating the performance of species richness estimators:  
534 sensitivity to sample grain size. *Journal of Animal Ecology* **75**, 274-287,  
535 doi:<http://dx.doi.org/10.1111/j.1365-2656.2006.01048.x> (2006).
- 536 75 Magurran, A. E. & McGill, B. J. in *Biological diversity: frontiers in measurement and assessment* (eds  
537 A. E. Magurran & B. J. McGill) Ch. 1, 1-7 (Oxford University Press, 2011).
- 538 76 Laliberté, E. & Legendre, P. A distance-based framework for measuring functional diversity from  
539 multiple traits. *Ecology* **91**, 299-305, doi:<http://dx.doi.org/10.1890/08-2244.1> (2010).
- 540 77 FD: measuring functional diversity from multiple traits, and other tools for functional ecology. R  
541 package version 1.0-12. (2014).
- 542 78 Burnham, K. P. & Anderson, D. R. *Model selection and multi-model inference: A practical*  
543 *information-theoretic approach*. (Springer, 2002).
- 544 79 R: A language and environment for statistical computing. 3.6.3 (R Foundation for Statistical  
545 Computing, Vienna, Austria, 2020).
- 546 80 vegan: Community Ecology Package. R package version 2.4-0. [https://CRAN.R-](https://CRAN.R-project.org/package=vegan)  
547 [project.org/package=vegan](https://CRAN.R-project.org/package=vegan) (2016).
- 548 81 Wickham, H. *ggplot2: elegant graphics for data analysis*. (Springer, 2009).
- 549 82 MuMIn: multi-model inference. R package version 1.15.6. [https://CRAN.R-](https://CRAN.R-project.org/package=MuumIn)  
550 [project.org/package=MuumIn](https://CRAN.R-project.org/package=MuumIn) (2016).
- 551 83 Tweedie: Tweedie exponential family models. R package version 2.2.1. [https://cran.r-](https://cran.r-project.org/web/packages/tweedie)  
552 [project.org/web/packages/tweedie](https://cran.r-project.org/web/packages/tweedie) (2014).
- 553

## 554 **Acknowledgements**

555 The Instituto Chico Mendes de Conservação da Biodiversidade (ICMBio) and the Amapá National  
556 Forest staff (Érico Emed Kauano and Sueli Gomes Pontes dos Santos) and the Federal University of  
557 Amapá (UNIFAP) provided logistical support. We thank the Brazilian Ministério do Meio Ambiente  
558 (“MMA”) for authorizing data collection (SISBIO permits 40355–1, 47859-1 and 47859-2). We also  
559 thank the local landowners who gave permission for data collection at their properties. We are deeply  
560 indebted to Cremilson and Cledinaldo Alves Marques and family for their dedication, commitment  
561 and assistance during the fieldwork.

562

## 563 **Author Contributions**

564 D.N. conceived of the project; V.J.U.CR and A.A.S collected data. V.J.U.CR, A.A.S and D.N.  
565 performed data analysis and interpretation. A.A.S prepared figure 1. D.N. prepared figures 2-5.  
566 T.M.F.C and D.N. wrote the main manuscript text. All authors reviewed and revised the manuscript.

567

## 568 **Competing Interests Statement**

569 The authors declare that they have no competing interests as defined by Nature Research, or other  
570 interests that might be perceived to influence the results and/or discussion reported in this paper.

571

## Supporting Information

### Big trees drive forest structure patterns across a lowland Amazon regrowth gradient

Tassiana Maylla Fontoura Caron<sup>1</sup>, Victor Juan Ulises Rodriguez Chuma<sup>1,2</sup>, Alexander Arévalo-Sandi<sup>3,4</sup>, Darren Norris<sup>1,3,5</sup> \*

<sup>1</sup> Programa de Pós-Graduação em Biodiversidade Tropical, Universidade Federal do Amapá (UNIFAP), Rod. Juscelino Kubitschek, Km 02, 68902-280, Macapá, AP, Brazil.

<sup>2</sup> Facultad de Ciencias Forestales, Universidad Nacional de la Amazonia Peruana (UNAP), Pevas 5ta cuadra, Iquitos, Perú.

<sup>3</sup> Programa de Pós-graduação em Ecologia, Instituto Nacional de Pesquisas da Amazônia (INPA), Av. André Araújo 2936, Petrópolis 69067-375 Manaus, AM, Brazil.

<sup>4</sup> Amazonian Mammals Research Group. Av. André Araújo 2936, Petrópolis 69067-375 Manaus, AM, Brazil.

<sup>5</sup> Coordenação de Ciências Ambientais, Universidade Federal do Amapá (UNIFAP), Rod. Juscelino Kubitschek Km 02, 68902-280 Macapá, AP, Brazil

\* Corresponding author at: Coordenação de Ciências Ambientais, Universidade Federal do Amapá (UNIFAP), Macapá, Brazil. Email address: [dnorris75@gmail.com](mailto:dnorris75@gmail.com) (D. Norris).

Supplementary Table S1

Table S1: Generalized Linear Model values.

| <i>Predictors</i>                | <b>All trees</b> |            |                  |             |            |                  | <b>Large trees</b> |            |                  |             |            |                  |
|----------------------------------|------------------|------------|------------------|-------------|------------|------------------|--------------------|------------|------------------|-------------|------------|------------------|
|                                  | <b>Full</b>      |            |                  | <b>Best</b> |            |                  | <b>Full</b>        |            |                  | <b>Best</b> |            |                  |
|                                  | <i>Est.</i>      | <i>CI</i>  | <i>p</i>         | <i>Est.</i> | <i>CI</i>  | <i>p</i>         | <i>Est.</i>        | <i>CI</i>  | <i>p</i>         | <i>Est.</i> | <i>CI</i>  | <i>p</i>         |
| (Intercept)                      | 0.46             | 0.40–0.53  | <b>&lt;0.001</b> | 0.46        | 0.43–0.50  | <b>&lt;0.001</b> | 0.66               | 0.50–0.81  | <b>&lt;0.001</b> | 0.64        | 0.55–0.76  | <b>&lt;0.001</b> |
| Last use                         | 0.00             | -0.00–0.00 | 0.933            |             |            |                  | -0.00              | -0.01–0.01 | 0.896            |             |            |                  |
| Regrowth (late v early)          | -0.01            | -0.10–0.07 | 0.826            | -0.03       | -0.08–0.01 | 0.176            | -0.04              | -0.24–0.17 | 0.710            | -0.05       | -0.20–0.08 | 0.441            |
| Regrowth (late v pasture)        | -0.00            | -0.09–0.08 | 0.966            | -0.03       | -0.07–0.02 | 0.245            | -0.08              | -0.27–0.10 | 0.355            | -0.07       | -0.21–0.06 | 0.311            |
| Plot (control v regrowth)        | 0.14             | 0.02–0.28  | <b>0.050</b>     | 0.08        | 0.02–0.14  | <b>0.022</b>     | 0.02               | -0.40–0.44 | 0.917            | 0.53        | 0.24–1.14  | <b>0.016</b>     |
| Interaction (Last use * early)   | -0.01            | -0.02–0.01 | 0.467            |             |            |                  | -0.01              | -0.05–0.03 | 0.525            |             |            |                  |
| Interaction (Last use * pasture) | -0.00            | -0.01–0.00 | 0.386            |             |            |                  | -0.00              | -0.01–0.01 | 0.986            |             |            |                  |
| Interaction (Last use * Plot)    | -0.00            | -0.01–0.00 | 0.280            |             |            |                  | 0.03               | -0.04–0.10 | 0.339            |             |            |                  |
| Interaction (Plot * early)       | 0.03             | -0.11–0.17 | 0.624            | 0.09        | -0.01–0.19 | 0.090            | 46.73              |            | 0.999            |             |            |                  |
| Interaction (Plot * pasture)     | 0.15             | 0.02–0.29  | <b>0.040</b>     | 0.17        | 0.06–0.30  | <b>0.011</b>     | 42.03              |            | 0.999            |             |            |                  |
| Observations                     | 30               |            |                  | 30          |            |                  | 30                 |            |                  | 30          |            |                  |
| R <sup>2</sup> Nagelkerke        | 0.83             |            |                  | 0.80        |            |                  | 0.81               |            |                  | 0.74        |            |                  |
| AIC                              | 229.40           |            |                  | 225.62      |            |                  | 140.45             |            |                  | 132.02      |            |                  |

1 Supplementary Table S2

2 Generalized Linear Models created to explain forest structure in 30 plots (15 control and 15 regrowth). Model summaries for responses of five structural attributes: (a) The  
 3 number of all trees  $\geq 10$  cm DBH ; (b) Proportion of small (DBH 10 – 20 cm) trees; (c) Proportion of large (DBH  $>60$  cm) trees; (d) Basal area of all trees; (e) Basal area of  
 4 large trees. Showing slope estimates (“Est”) for 10 variables in 5 models (time, regrowth class, mammal diversity, hydrography and topography). “NE” denotes cases  
 5 when values could not be reliably estimated. The time model included years since the regrowth site was opened and years since last use. The regrowth model included sites  
 6 grouped into three regrowth classes (pasture, early-regrowth and late-regrowth). Topography included altitude (masl) and slope. Hydrography was modelled with TWI  
 7 (Topographic wetness index), DND (Distance to Network Drainage) calculated from the interaction between HAND (Height above network drainage) and HDND (Horizontal  
 8 distance to network drainage). Mammal diversity was obtained from camera-traps and quantified as species richness and Functional Dispersion (FDis).

9 (a) The number of all trees DBH  $\geq 10$  cm

| <i>Predictors</i>         | <b>Time</b> |            |              | <b>Regrowth class</b> |            |                  | <b>Mammals</b> |               |              | <b>Hydrography</b> |               |          | <b>Topography</b> |                 |          |
|---------------------------|-------------|------------|--------------|-----------------------|------------|------------------|----------------|---------------|--------------|--------------------|---------------|----------|-------------------|-----------------|----------|
|                           | <i>Est</i>  | <i>CI</i>  | <i>p</i>     | <i>Est</i>            | <i>CI</i>  | <i>p</i>         | <i>Est</i>     | <i>CI</i>     | <i>p</i>     | <i>Est</i>         | <i>CI</i>     | <i>p</i> | <i>Est</i>        | <i>CI</i>       | <i>p</i> |
| (Intercept)               | 35.4        | 15.9–55.0  | <b>0.002</b> | 35.2                  | 27.3–43.1  | <b>&lt;0.001</b> | 25.04          | 5.31–44.77    | <b>0.021</b> | 20.04              | -25.26–65.35  | 0.395    | 33.66             | -67.46–134.78   | 0.521    |
| Plot type                 | -5.2        | -32.9–22.4 | 0.714        | 6.6                   | -4.6–17.8  | 0.257            | -8.48          | -29.64–12.67  | 0.440        | -95.06             | -201.10–10.97 | 0.093    | -402.66           | -1045.25–239.93 | 0.232    |
| Since first open          | -0.2        | -1.2–0.9   | 0.764        |                       |            |                  |                |               |              |                    |               |          |                   |                 |          |
| Since last use            | 0.1         | -2.7–2.8   | 0.954        |                       |            |                  |                |               |              |                    |               |          |                   |                 |          |
| Plot *First               | -0.4        | -1.9–1.1   | 0.573        |                       |            |                  |                |               |              |                    |               |          |                   |                 |          |
| Plot *Last                | -0.8        | -4.7–3.1   | 0.703        |                       |            |                  |                |               |              |                    |               |          |                   |                 |          |
| First *Last               | 0.0         | -0.1–0.1   | 0.963        |                       |            |                  |                |               |              |                    |               |          |                   |                 |          |
| Plot *First *Last         | 0.1         | -0.1–0.3   | 0.388        |                       |            |                  |                |               |              |                    |               |          |                   |                 |          |
| Regrowth (Late v Early)   |             |            |              | -1.2                  | -12.4–10.0 | 0.835            |                |               |              |                    |               |          |                   |                 |          |
| Regrowth (Late v Pasture) |             |            |              | -2.4                  | -13.6–8.8  | 0.677            |                |               |              |                    |               |          |                   |                 |          |
| Plot *Early               |             |            |              | -14.0                 | -29.8–1.8  | 0.095            |                |               |              |                    |               |          |                   |                 |          |
| Plot*Pasture              |             |            |              | -23.2                 | -39.0–7.4  | <b>0.008</b>     |                |               |              |                    |               |          |                   |                 |          |
| Species.richness          |             |            |              |                       |            |                  | 2.9            | -7.0–12.8     | 0.571        |                    |               |          |                   |                 |          |
| Functional.dispersion     |             |            |              |                       |            |                  | 41.7           | -78.5–162.0   | 0.503        |                    |               |          |                   |                 |          |
| Plot *Species.richness    |             |            |              |                       |            |                  | 15.1           | 1.6–28.5      | <b>0.039</b> |                    |               |          |                   |                 |          |
| Plot *FDis                |             |            |              |                       |            |                  | -37.0          | -174.8–100.75 | 0.604        |                    |               |          |                   |                 |          |

|                           | Time     | Regrowth class | Mammals                  | Hydrography                     | Topography             |
|---------------------------|----------|----------------|--------------------------|---------------------------------|------------------------|
| Richness *FDis            |          |                | -11.6 -52.86–29.65 0.587 |                                 |                        |
| Plot *Richness *FDis      |          |                | -36.2 -88.80–16.5 0.192  |                                 |                        |
| TWI                       |          |                |                          | 1.8 -4.2–7.8 0.561              |                        |
| DND                       |          |                |                          | -6.6 -42.1–29.0 0.722           |                        |
| Plot * TWI                |          |                |                          | 12.7 -2.0–27.3 0.105            |                        |
| Plot * DND                |          |                |                          | -155.8 -285.0–25.3 <b>0.029</b> |                        |
| TWI * DND                 |          |                |                          | 1.6 -4.6–7.7 0.623              |                        |
| Plot * TWI* DND           |          |                |                          | 20.4 0.9–39.9 0.053             |                        |
| Altitude                  |          |                |                          |                                 | -0.0 -1.0–1.0 0.980    |
| Slope                     |          |                |                          |                                 | -1.7 -16.9–13.8 0.845  |
| Plot *Altitude            |          |                |                          |                                 | 3.7 -2.4–9.7 0.250     |
| Plot * Slope              |          |                |                          |                                 | 37.9 -70.3–146.2 0.499 |
| Altitude * Slope          |          |                |                          |                                 | 0.0 -0.1–0.2 0.813     |
| Plot *Altitude* Slope     |          |                |                          |                                 | -0.34 -1.4–0.7 0.522   |
| Observations              | 30       | 30             | 30                       | 30                              | 30                     |
| R <sup>2</sup> Nagelkerke | 1.000    | 1.000          | 1.000                    | 1.000                           | 1.000                  |
| Deviance                  | 2206.473 | 1942.400       | 1883.533                 | 2095.536                        | 1438.744               |
| AIC                       | 232.075  | 224.251        | 227.328                  | 230.527                         | 219.246                |
| log-Likelihood            | -107.037 | -105.125       | -104.664                 | -106.264                        | -100.623               |

## (b) Proportion of small (DBH 10 – 20 cm) trees

| <i>Predictors</i>         | <b>Time</b>       |           |                  | <b>Regrowth class</b> |           |                  | <b>Mammals</b>    |           |              | <b>Hydrography</b> |           |          | <b>Topography</b> |           |          |
|---------------------------|-------------------|-----------|------------------|-----------------------|-----------|------------------|-------------------|-----------|--------------|--------------------|-----------|----------|-------------------|-----------|----------|
|                           | <i>OddsRatios</i> | <i>CI</i> | <i>p</i>         | <i>OddsRatios</i>     | <i>CI</i> | <i>p</i>         | <i>OddsRatios</i> | <i>CI</i> | <i>p</i>     | <i>OddsRatios</i>  | <i>CI</i> | <i>p</i> | <i>OddsRatios</i> | <i>CI</i> | <i>p</i> |
| (Intercept)               | 1.1               | 0.6–2.2   | 0.704            | 1.6                   | 1.2–2.2   | <b>0.002</b>     | 1.1               | 0.5–2.5   | 0.778        | 0.5                | 0.11–2.7  | 0.461    | 5.2               | 0.1–515.3 | 0.475    |
| Plot type                 | 38.4              | 8.6–236.0 | <b>&lt;0.001</b> | 3.7                   | 2.0–5.1   | <b>&lt;0.001</b> | 5.7               | 2.1–15.3  | <b>0.001</b> | 0.4                | 0.00–66.8 | 0.713    | 126.0             | 0.0–313.0 | 0.713    |
| Since first open          | 1.0               | 1.0–1.1   | 0.336            |                       |           |                  |                   |           |              |                    |           |          |                   |           |          |
| Since last use            | 1.0               | 0.9–1.1   | 0.834            |                       |           |                  |                   |           |              |                    |           |          |                   |           |          |
| Plot *First               | 0.9               | 0.8–1.0   | <b>0.015</b>     |                       |           |                  |                   |           |              |                    |           |          |                   |           |          |
| Plot *Last                | 0.8               | 0.7–1.0   | <b>0.017</b>     |                       |           |                  |                   |           |              |                    |           |          |                   |           |          |
| First *Last               | 1.0               | 1.0–1.0   | 0.841            |                       |           |                  |                   |           |              |                    |           |          |                   |           |          |
| Plot *First *Last         | 1.0               | 1.0–1.0   | <b>0.029</b>     |                       |           |                  |                   |           |              |                    |           |          |                   |           |          |
| Regrowth (Late v Early)   |                   |           |                  | 0.8                   | 0.5–1.2   | 0.302            |                   |           |              |                    |           |          |                   |           |          |
| Regrowth (Late v Pasture) |                   |           |                  | 1.0                   | 0.6–1.5   | 0.856            |                   |           |              |                    |           |          |                   |           |          |
| Plot *Early               |                   |           |                  | 1.7                   | 0.8–3.6   | 0.190            |                   |           |              |                    |           |          |                   |           |          |
| Plot*Pasture              |                   |           |                  | 1.0                   | 0.4–2.2   | 0.938            |                   |           |              |                    |           |          |                   |           |          |
| Species.richness          |                   |           |                  |                       |           |                  | 1.2               | 0.8–1.8   | 0.284        |                    |           |          |                   |           |          |
| Functional.dispersion     |                   |           |                  |                       |           |                  | 2.3               | 0.0–256.3 | 0.724        |                    |           |          |                   |           |          |
| Plot *Species.richness    |                   |           |                  |                       |           |                  | 1.3               | 0.7–2.5   | 0.415        |                    |           |          |                   |           |          |
| Plot *FDis                |                   |           |                  |                       |           |                  | 0.0               | 0.0–0.3   | <b>0.020</b> |                    |           |          |                   |           |          |
| Richness *FDis            |                   |           |                  |                       |           |                  | 0.5               | 0.1–2.4   | 0.389        |                    |           |          |                   |           |          |
| Plot *Richness *FDis      |                   |           |                  |                       |           |                  | 1.7               | 0.1–22.2  | 0.702        |                    |           |          |                   |           |          |
| TWI                       |                   |           |                  |                       |           |                  |                   |           |              | 1.1                | 1.0–1.4   | 0.210    |                   |           |          |
| DND                       |                   |           |                  |                       |           |                  |                   |           |              | 0.4                | 0.1–1.5   | 0.200    |                   |           |          |
| Plot * TWI                |                   |           |                  |                       |           |                  |                   |           |              | 1.3                | 0.6–2.6   | 0.464    |                   |           |          |
| Plot * DND                |                   |           |                  |                       |           |                  |                   |           |              | 0.0                | 0.0–12.4  | 0.211    |                   |           |          |
| TWI * DND                 |                   |           |                  |                       |           |                  |                   |           |              | 1.2                | 0.9–1.5   | 0.169    |                   |           |          |

|                       | Time | Regrowth class | Mammals | Hydrography |         |       | Topography |           |       |
|-----------------------|------|----------------|---------|-------------|---------|-------|------------|-----------|-------|
| Plot * TWI* DND       |      |                |         | 1.5         | 0.6–3.8 | 0.411 |            |           |       |
| Altitude              |      |                |         |             |         |       | 1.0        | 1.0–1.0   | 0.775 |
| Slope                 |      |                |         |             |         |       | 0.6        | 0.3–1.2   | 0.153 |
| Plot *Altitude        |      |                |         |             |         |       | 0.9        | 0.6–1.5   | 0.803 |
| Plot * Slope          |      |                |         |             |         |       | 0.7        | 0.0–160.2 | 0.920 |
| Altitude * Slope      |      |                |         |             |         |       | 1.0        | 1.0–1.0   | 0.190 |
| Plot *Altitude* Slope |      |                |         |             |         |       | 1.0        | 0.9–1.1   | 0.965 |

|                     |         |         |         |         |         |         |         |         |         |
|---------------------|---------|---------|---------|---------|---------|---------|---------|---------|---------|
| Observations        | 30      | 30      | 30      | 30      | 30      | 30      | 30      | 30      | 30      |
| R <sup>2</sup> Tjur | 0.133   | 0.111   | 0.113   | 0.113   | 0.188   | 0.188   | 0.192   | 0.192   | 0.192   |
| Deviance            | 46.970  | 60.088  | 45.259  | 45.259  | 39.873  | 39.873  | 33.410  | 33.410  | 33.410  |
| AIC                 | 158.064 | 167.181 | 156.352 | 156.352 | 150.967 | 150.967 | 144.503 | 144.503 | 144.503 |
| log-Likelihood      | -71.032 | -77.591 | -70.176 | -70.176 | -67.483 | -67.483 | -64.252 | -64.252 | -64.252 |

12

13

14



| <i>Predictors</i>         | <b>Time</b>        |           |                  | <b>Regrowth class</b> |           |                  | <b>Mammals</b>     |           |              | <b>Hydrography</b> |           |              | <b>Topography</b>  |           |          |
|---------------------------|--------------------|-----------|------------------|-----------------------|-----------|------------------|--------------------|-----------|--------------|--------------------|-----------|--------------|--------------------|-----------|----------|
|                           | <i>Odds Ratios</i> | <i>CI</i> | <i>p</i>         | <i>Odds Ratios</i>    | <i>CI</i> | <i>p</i>         | <i>Odds Ratios</i> | <i>CI</i> | <i>p</i>     | <i>Odds Ratios</i> | <i>CI</i> | <i>p</i>     | <i>Odds Ratios</i> | <i>CI</i> | <i>p</i> |
| (Intercept)               | 0.0                | 0.0–0.1   | <b>&lt;0.001</b> | 0.0                   | 0.0–0.1   | <b>&lt;0.001</b> | 0.1                | 0.0–0.5   | <b>0.004</b> | 0.0                | 0.0–0.8   | <b>0.032</b> | 6.43               | NE        | 0.647    |
| Plot type                 | 0.4                | 0.0–54.2  | 0.714            | 0.2                   | 0.0–0.9   | <b>0.042</b>     | 0.0                | 0.0–0.9   | <b>0.040</b> | 3.9                | NE        | 0.887        | NE                 | NE        | 0.830    |
| Since first open          | 1.1                | 1.0–1.2   | 0.071            |                       |           |                  |                    |           |              |                    |           |              |                    |           |          |
| Since last use            | 1.2                | 1.0–1.5   | 0.088            |                       |           |                  |                    |           |              |                    |           |              |                    |           |          |
| Plot *First               | 1.0                | 0.7–1.2   | 0.685            |                       |           |                  |                    |           |              |                    |           |              |                    |           |          |
| Plot *Last                | 0.8                | 0.4–1.6   | 0.492            |                       |           |                  |                    |           |              |                    |           |              |                    |           |          |
| First *Last               | 1.0                | 1.0–1.0   | 0.060            |                       |           |                  |                    |           |              |                    |           |              |                    |           |          |
| Plot *First *Last         | 1.0                | 1.0–1.0   | 0.505            |                       |           |                  |                    |           |              |                    |           |              |                    |           |          |
| Regrowth (Late v Early)   |                    |           |                  | 1.5                   | 0.6–3.8   | 0.417            |                    |           |              |                    |           |              |                    |           |          |
| Regrowth (Late v Pasture) |                    |           |                  | 2.4                   | 1.0–5.8   | 0.060            |                    |           |              |                    |           |              |                    |           |          |
| Plot *Early               |                    |           |                  | 0.3                   | 0.0–9.6   | 0.526            |                    |           |              |                    |           |              |                    |           |          |
| Plot*Pasture              |                    |           |                  | 0.3                   | 0.0–9.7   | 0.530            |                    |           |              |                    |           |              |                    |           |          |
| Species.richness          |                    |           |                  |                       |           |                  | 0.9                | 0.4–1.8   | 0.653        |                    |           |              |                    |           |          |
| Functional.dispersion     |                    |           |                  |                       |           |                  | 0.6                | NE        | 0.921        |                    |           |              |                    |           |          |
| Plot *Species.richness    |                    |           |                  |                       |           |                  | 0.1                | 0.0–5.3   | 0.271        |                    |           |              |                    |           |          |
| Plot *FDis                |                    |           |                  |                       |           |                  | 165.7              | NE        | 0.540        |                    |           |              |                    |           |          |
| Richness *FDis            |                    |           |                  |                       |           |                  | 0.9                | 0.0–17.0  | 0.936        |                    |           |              |                    |           |          |
| Plot *Richness *FDis      |                    |           |                  |                       |           |                  | 1114.3             | NE        | 0.253        |                    |           |              |                    |           |          |
| TWI                       |                    |           |                  |                       |           |                  |                    |           |              | 1.1                | 0.7–1.6   | 0.659        |                    |           |          |
| DND                       |                    |           |                  |                       |           |                  |                    |           |              | 0.6                | 0.1–4.9   | 0.593        |                    |           |          |
| Plot * TWI                |                    |           |                  |                       |           |                  |                    |           |              | 0.6                | 0.0–7.5   | 0.669        |                    |           |          |
| Plot * DND                |                    |           |                  |                       |           |                  |                    |           |              | NE                 | NE        | 0.393        |                    |           |          |

|                       | Time    | Regrowth class | Mammals | Hydrography        | Topography           |
|-----------------------|---------|----------------|---------|--------------------|----------------------|
| TWI * DND             |         |                |         | 1.1 0.8–1.6 0.562  |                      |
| Plot * TWI* DND       |         |                |         | 0.3 0.0–10.4 0.462 |                      |
| Altitude              |         |                |         |                    | 0.96 0.89–1.03 0.265 |
| Slope                 |         |                |         |                    | 0.63 0.18–2.16 0.464 |
| Plot *Altitude        |         |                |         |                    | 0.81 0.13–5.00 0.821 |
| Plot * Slope          |         |                |         |                    | 0.12 NE 0.897        |
| Altitude * Slope      |         |                |         |                    | 1.00 0.99–1.01 0.406 |
| Plot *Altitude* Slope |         |                |         |                    | 1.02 0.75–1.38 0.906 |
| Observations          | 30      | 30             | 30      | 30                 | 30                   |
| R <sup>2</sup> Tjur   | 0.027   | 0.008          | 0.001   | 0.028              | 0.026                |
| Deviance              | 22.439  | 23.760         | 22.382  | 28.416             | 27.326               |
| AIC                   | 72.554  | 69.778         | 72.532  | 78.313             | 77.272               |
| log-Likelihood        | -28.277 | -28.889        | -28.266 | -31.156            | -30.636              |

16

17

18

| <i>Predictors</i>         | <b>Time</b> |            |                  | <b>Regrowth class</b> |            |                  | <b>Mammals</b> |            |                  | <b>Hydrography</b> |            |                  | <b>Topography</b> |             |              |
|---------------------------|-------------|------------|------------------|-----------------------|------------|------------------|----------------|------------|------------------|--------------------|------------|------------------|-------------------|-------------|--------------|
|                           | <i>Est</i>  | <i>CI</i>  | <i>p</i>         | <i>Est</i>            | <i>CI</i>  | <i>p</i>         | <i>Est</i>     | <i>CI</i>  | <i>p</i>         | <i>Est</i>         | <i>CI</i>  | <i>p</i>         | <i>Est</i>        | <i>CI</i>   | <i>p</i>     |
| (Intercept)               | 0.45        | 0.39–0.52  | <b>&lt;0.001</b> | 0.46                  | 0.43–0.50  | <b>&lt;0.001</b> | 0.43           | 0.36–0.51  | <b>&lt;0.001</b> | 0.48               | 0.31–0.65  | <b>&lt;0.001</b> | 0.48              | 0.10–0.90   | <b>0.028</b> |
| Plot type                 | 0.21        | 0.03–0.43  | <b>0.046</b>     | 0.08                  | 0.02–0.14  | <b>0.022</b>     | 0.25           | 0.13–0.38  | <b>0.001</b>     | 0.35               | -0.59–1.47 | 0.500            | 4.85              | -0.94–10.40 | 0.106        |
| Since first open          | -0.00       | -0.00–0.00 | 0.956            |                       |            |                  |                |            |                  |                    |            |                  |                   |             |              |
| Since last use            | -0.00       | -0.01–0.00 | 0.341            |                       |            |                  |                |            |                  |                    |            |                  |                   |             |              |
| Plot *First               | -0.00       | -0.01–0.01 | 0.790            |                       |            |                  |                |            |                  |                    |            |                  |                   |             |              |
| Plot *Last                | 0.00        | -0.02–0.02 | 0.998            |                       |            |                  |                |            |                  |                    |            |                  |                   |             |              |
| First *Last               | 0.00        | -0.00–0.00 | 0.331            |                       |            |                  |                |            |                  |                    |            |                  |                   |             |              |
| Plot *First *Last         | -0.00       | -0.00–0.00 | 0.719            |                       |            |                  |                |            |                  |                    |            |                  |                   |             |              |
| Regrowth (Late v Early)   |             |            |                  | -0.03                 | -0.08–0.01 | 0.176            |                |            |                  |                    |            |                  |                   |             |              |
| Regrowth (Late v Pasture) |             |            |                  | -0.03                 | -0.07–0.02 | 0.245            |                |            |                  |                    |            |                  |                   |             |              |
| Plot *Early               |             |            |                  | 0.09                  | -0.01–0.19 | 0.090            |                |            |                  |                    |            |                  |                   |             |              |
| Plot*Pasture              |             |            |                  | 0.17                  | 0.06–0.30  | <b>0.011</b>     |                |            |                  |                    |            |                  |                   |             |              |
| Species.richness          |             |            |                  |                       |            |                  | 0.01           | -0.03–0.05 | 0.624            |                    |            |                  |                   |             |              |
| Functional.dispersion     |             |            |                  |                       |            |                  | -0.04          | -0.53–0.42 | 0.855            |                    |            |                  |                   |             |              |
| Plot *Species.richness    |             |            |                  |                       |            |                  | -0.06          | -0.15–0.03 | 0.192            |                    |            |                  |                   |             |              |
| Plot *FDis                |             |            |                  |                       |            |                  | -0.53          | -1.28–0.22 | 0.178            |                    |            |                  |                   |             |              |
| Richness *FDis            |             |            |                  |                       |            |                  | -0.01          | -0.17–0.15 | 0.900            |                    |            |                  |                   |             |              |
| Plot *Richness *FDis      |             |            |                  |                       |            |                  | 0.22           | -0.11–0.57 | 0.210            |                    |            |                  |                   |             |              |
| TWI                       |             |            |                  |                       |            |                  |                |            |                  | -0.01              | -0.03–0.02 | 0.634            |                   |             |              |
| DND                       |             |            |                  |                       |            |                  |                |            |                  | 0.05               | -0.09–0.17 | 0.499            |                   |             |              |
| Plot * TWI                |             |            |                  |                       |            |                  |                |            |                  | -0.03              | -0.18–0.10 | 0.679            |                   |             |              |
| Plot * DND                |             |            |                  |                       |            |                  |                |            |                  | 0.46               | -0.74–1.86 | 0.486            |                   |             |              |

|                       |  |  |  |       |       |       |                        |
|-----------------------|--|--|--|-------|-------|-------|------------------------|
| TWI * DND             |  |  |  | -0.01 | -0.03 | -0.02 | 0.468                  |
| Plot * TWI* DND       |  |  |  | -0.06 | -0.26 | -0.12 | 0.553                  |
| Altitude              |  |  |  |       |       |       | 0.00 -0.00-0.00 0.994  |
| Slope                 |  |  |  |       |       |       | -0.02 -0.08-0.03 0.412 |
| Plot *Altitude        |  |  |  |       |       |       | -0.04 -0.10-0.01 0.126 |
| Plot * Slope          |  |  |  |       |       |       | -0.48 -1.33-0.43 0.297 |
| Altitude * Slope      |  |  |  |       |       |       | 0.00 -0.00-0.00 0.473  |
| Plot *Altitude* Slope |  |  |  |       |       |       | 0.00 -0.00-0.01 0.316  |

---

|                           |         |         |         |         |         |
|---------------------------|---------|---------|---------|---------|---------|
| Observations              | 30      | 30      | 30      | 30      | 30      |
| R <sup>2</sup> Nagelkerke | 0.997   | 0.998   | 0.997   | 0.996   | 0.999   |
| Deviance                  | 74.501  | 65.927  | 68.631  | 82.585  | 47.959  |
| AIC                       | 233.200 | 225.615 | 230.793 | 236.227 | 220.376 |

20

21

| <i>Predictors</i>         | <b>Time</b> |                |          | <b>Regrowth class</b> |           |          | <b>Mammals</b> |           |          | <b>Hydrography</b> |           |          | <b>Topography</b> |             |          |
|---------------------------|-------------|----------------|----------|-----------------------|-----------|----------|----------------|-----------|----------|--------------------|-----------|----------|-------------------|-------------|----------|
|                           | <i>Est</i>  | <i>CI</i>      | <i>p</i> | <i>Est</i>            | <i>CI</i> | <i>p</i> | <i>Est</i>     | <i>CI</i> | <i>p</i> | <i>Est</i>         | <i>CI</i> | <i>p</i> | <i>Est</i>        | <i>CI</i>   | <i>p</i> |
| (Intercept)               | 0.7         | 0.5–0.9        | <0.001   | 0.7                   | 0.6–0.7   | <0.001   | 0.7            | 0.4–0.7   | <0.001   | 0.7                | 0.4–1.0   | <0.001   | 0.5               | -0.53–1.71  | 0.406    |
| Plot type                 | 535.7       | NE             | 0.998    | 0.3                   | -0.0–0.6  | 0.051    | 62.9           | NE        | 0.999    | NE                 | NE        | 0.823    | -31.5             | -204.4–39.4 | 0.552    |
| Since first open          | -0.0        | -0.0–0.0       | 0.303    |                       |           |          |                |           |          |                    |           |          |                   |             |          |
| Since last use            | -0.0        | -0.0–0.0       | 0.186    |                       |           |          |                |           |          |                    |           |          |                   |             |          |
| Plot *First               | -26.7       | NE             | 0.998    |                       |           |          |                |           |          |                    |           |          |                   |             |          |
| Plot *Last                | -27.4       | NE             | 0.998    |                       |           |          |                |           |          |                    |           |          |                   |             |          |
| First *Last               | 0.0         | -0.0–0.0       | 0.159    |                       |           |          |                |           |          |                    |           |          |                   |             |          |
| Plot *First *Last         | 1.4         | -1447.1–1449.9 | 0.998    |                       |           |          |                |           |          |                    |           |          |                   |             |          |
| Regrowth (Late v Early)   |             |                |          | -0.1                  | -0.2–0.0  | 0.189    |                |           |          |                    |           |          |                   |             |          |
| Regrowth (Late v Pasture) |             |                |          | -0.1                  | -0.2–0.0  | 0.103    |                |           |          |                    |           |          |                   |             |          |
| Plot *Early               |             |                |          | 39.5                  | NE        | 0.998    |                |           |          |                    |           |          |                   |             |          |
| Plot*Pasture              |             |                |          | 39.5                  | NE        | 0.998    |                |           |          |                    |           |          |                   |             |          |
| Species.richness          |             |                |          |                       |           |          | 0.0            | -0.1–0.1  | 0.762    |                    |           |          |                   |             |          |
| Functional.dispersion     |             |                |          |                       |           |          | -0.1           | -1.0–0.8  | 0.811    |                    |           |          |                   |             |          |
| Plot *Species.richness    |             |                |          |                       |           |          | 89.8           | NE        | 0.999    |                    |           |          |                   |             |          |
| Plot *FDis                |             |                |          |                       |           |          | -212.3         | NE        | 0.999    |                    |           |          |                   |             |          |
| Richness *FDis            |             |                |          |                       |           |          | 0.0            | -0.3–0.3  | 0.859    |                    |           |          |                   |             |          |
| Plot *Richness *FDis      |             |                |          |                       |           |          | -252.1         | NE        | 0.999    |                    |           |          |                   |             |          |
| TWI                       |             |                |          |                       |           |          |                |           |          | -0.02              | -0.1–0.0  | 0.392    |                   |             |          |
| DND                       |             |                |          |                       |           |          |                |           |          | 0.11               | -0.1–0.3  | 0.273    |                   |             |          |
| Plot * TWI                |             |                |          |                       |           |          |                |           |          | -63173.6           | NE        | 0.823    |                   |             |          |
| Plot * DND                |             |                |          |                       |           |          |                |           |          | 976655.4           | NE        | 0.823    |                   |             |          |

|                           | <b>Time</b> | <b>Regrowth class</b> | <b>Mammals</b> | <b>Hydrography</b>   | <b>Topography</b>   |
|---------------------------|-------------|-----------------------|----------------|----------------------|---------------------|
| TWI * DND                 |             |                       |                | -0.02 -0.1-0.0 0.239 |                     |
| Plot * TWI* DND           |             |                       |                | -96752.4 NE 0.823    |                     |
| Altitude                  |             |                       |                |                      | 0.0 -0.0-0.0 0.765  |
| Slope                     |             |                       |                |                      | -0.0 -0.2-0.1 0.861 |
| Plot *Altitude            |             |                       |                |                      | 0.3 -0.4-1.9 0.550  |
| Plot * Slope              |             |                       |                |                      | 5.7 -6.2-36.0 0.536 |
| Altitude * Slope          |             |                       |                |                      | 0.0 -0.0-0.0 0.913  |
| Plot *Altitude* Slope     |             |                       |                |                      | -0.1 -0.3-0.1 0.538 |
| Observations              | 30          | 30                    | 30             | 30                   | 30                  |
| R <sup>2</sup> Nagelkerke | 1.000       | 1.000                 | 1.000          | 1.000                | 1.000               |
| Deviance                  | 140.557     | 134.847               | 121.384        | 119.165              | 161.409             |
| AIC                       | 138.281     | 133.726               | 136.303        | 136.050              | 140.145             |

23

24

25

26

27
